# Supplementary material for: A eutectogels-catalyzed one-pot multi-component reaction: access to pyridine and chromene derivatives
Source: Royal Society of Chemistry journal article supplement (doi:10.1039/d4ra00123k), 2024-01-01
Supplement: d4ra00123k1.pdf [file d4ra00123k1.pdf]

## Supporting information

# Eutectogels-catalyzed for one-pot multi-component reaction: Access to pyridine and chromene derivatives

Phat Ngoc Nguyen,<sup>a,b</sup> Linh Ho Thuy Nguyen,<sup>b,c</sup> Tan Le Hoang Doan,<sup>b,c</sup> Phuong  
Hoang Tran<sup>a,b</sup> and Hai Truong Nguyen<sup>a,b\*</sup>

<sup>a</sup> Department of Organic Chemistry, Faculty of Chemistry, University of Science, Ho Chi Minh City, 700000, Vietnam. Email: [ngthai@hcmus.edu.vn](mailto:ngthai@hcmus.edu.vn)

<sup>b</sup> Vietnam National University-Ho Chi Minh City, 700000, Vietnam.

<sup>c</sup> Center for Innovative Materials and Architectures, Vietnam National University – Ho Chi Minh City, 721337, Vietnam.

\*Corresponding author:

Hai Truong Nguyen: phone number: +84-908-108-824; e-mail: [ngthai@hcmus.edu.vn](mailto:ngthai@hcmus.edu.vn)

## Table of contents

|                                           |                |
|-------------------------------------------|----------------|
| <b>Section S1. Chemical and equipment</b> | <b>S2-S4</b>   |
| <b>Section S2. NMR data</b>               | <b>S4x-S11</b> |
| <b>Section S3. NMR spectral</b>           | <b>S12-S35</b> |
| <b>Section S4. References</b>             | <b>S36-S37</b> |

## Section S1. Chemical and equipment

### 2.1. Chemical

Benzaldehyde (99%), 4-methoxybenzaldehyde (98%), 4-chlorobenzaldehyde (98%), 4-fluorobenzaldehyde (98%), 2-chlorobenzaldehyde (99%), 2-fluorobenzaldehyde (97%), 4-bromobenzaldehyde (99%), 4-methylbenzaldehyde (97%), 2-furaldehyde (99%), ammonium acetate (97%) were purchased from Sigma-Aldrich. 1,3-cyclohexadione (97%), acetophenone (98%), malononitrile (99%), and dimedone (99%) were acquired from Acros.

Ethyl acetate (for analysis EMSURE ACS,ISO,Reag. Ph Eur) and Acetone (for analysis EMPARTA ACS) was acquired from Merck. Thin-layer chromatography (TLC) was conducted using aluminium plates (F-254) covered with silica gel. The experiment included the use of silica gel (230–400 mesh, Merck) for column chromatography.

### 2.2. Techniques for analysis

The  $^1\text{H-NMR}$  and  $^{13}\text{C-NMR}$  spectra were acquired utilizing a Bruker Avance 500 MHz instrument in  $\text{DMSO-}d_6$ , with the solvent peaks serving as the system's internal standard. The boiling points were determined utilizing a Buchi B-545 melting point apparatus. Fourier-transform infrared (FTIR) spectra were acquired using a Bruker E400 FT-IR spectrometer. A Q-500 thermal gravimetric analyzer was used to conduct thermogravimetric analysis (TGA). The experimental procedure included exposing the sample to a temperature gradient at a rate of  $5\text{ }^\circ\text{C}$  per minute, while maintaining a controlled airflow. The refining process included the acquisition of Powder X-ray diffraction (P-XRD) data using a Bruker D8 Advance instrument. The data was obtained by employing Ni-filtered Cu K ( $\lambda = 1.54059$ ) radiation. The shape and structure of the material were examined with a Hitachi S-4800 scanning electron microscopy (SEM) in combination with an XZS-107T digital microscope and an NHV-CAM camera, aided by the eScope software. The  $\text{N}_2$  isotherm was measured and analyzed using the Quantachrome NOVA 3200e system, which operated at a temperature of 77 K. The EMAX energy EX-400 EDX device was used to perform an examination using energy-dispersive X-ray spectroscopy (EDX). The high-resolution mass spectra were acquired using a Bruker micrOTOF-QII mass spectrometer, which was operated in positive electrospray ionization mode and had an ionization energy of 80 electron volts (eV).

**Table S1.** The investigation of the mechanism pathway through control reactions

| Entry | Substance 1   | Substance 2      | Product isolated |
|-------|---------------|------------------|------------------|
| 1     | Benzaldehyde  | Malononitrile    | +                |
| 2     | Benzaldehyde  | Cyclohexanone    | -                |
| 3     | Benzaldehyde  | Ammonium acetate | -                |
| 4     | Malononitrile | Cyclohexanone    | -                |
| 5     | Malononitrile | Ammonium acetate | -                |
| 6     | Cyclohexanone | Ammonium acetate | -                |

Reaction condition: substance 1 (1 mmol) and substance 2 (1 mmol) within 15 minutes at 80 °C; “+”: Reaction; “-”: No reaction.

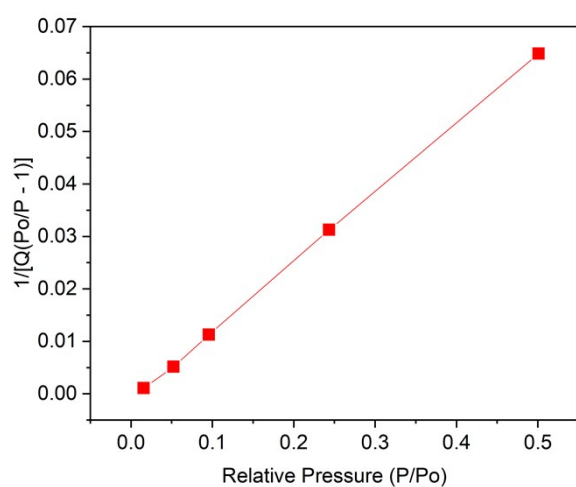

Multipoint BET plot

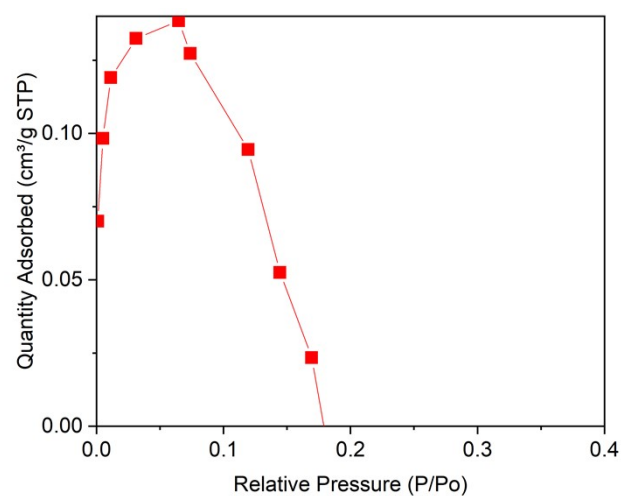

N<sub>2</sub> adsorption-desorption isotherms

BET surface area:  $0.5751 \pm 0.0044$  m<sup>2</sup>/g.

Pore Volume: 0.000008 cm<sup>3</sup>/g

**Fig. S1.** BET of ETG-Acetamide fresh.

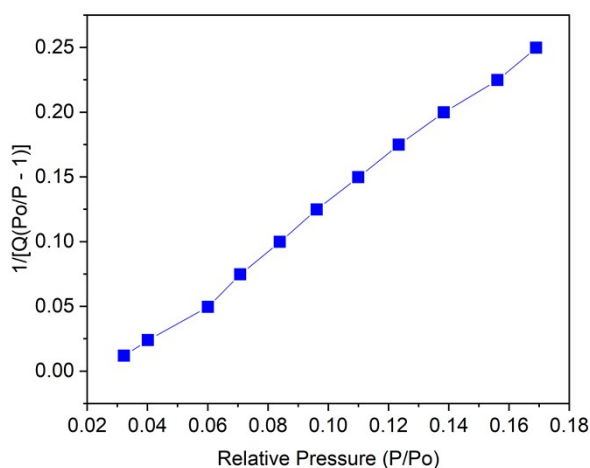

Multipoint BET plot

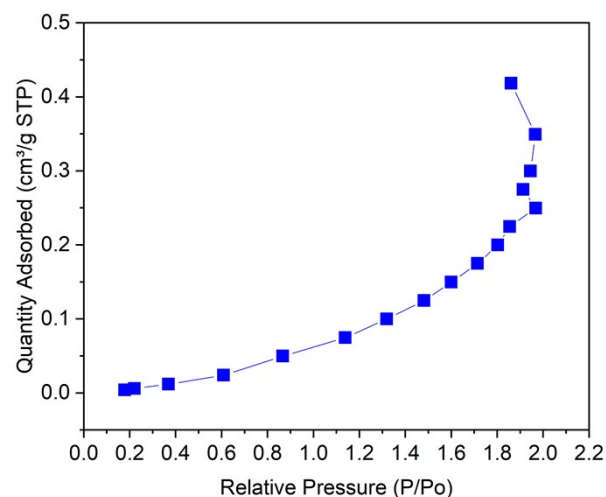

N<sub>2</sub> adsorption-desorption isotherms

BET surface area:  $7.3835 \pm 0.1136$  m<sup>2</sup>/g

**Fig. S2.** BET of ETG-Acetamide reusable (after 3 times).

## Section S2. NMR data

### *2-Amino-4-phenyl-5,6,7,8-tetrahydroquinoline-3-carbonitrile*<sup>1-5</sup> (**1a**)

With 71%, the pale yellow powder was produced.  $R_f = 0.59$  (*n*-Hexane-Ethyl acetate = 5:5); Mp. = 242-244 °C; <sup>1</sup>H-NMR (500 MHz, DMSO-*d*<sub>6</sub>):  $\delta = 1.55$ -1.60 (m, 2H), 1.70-1.75 (m, 2H), 2.19 (t,  $J = 6.5$  Hz, 2H), 2.70 (t,  $J = 6.5$  Hz, 2H), 5.64 (s, 2H), 7.26-7.28 (m, 2H), 7.44-7.46, (m, 1H), 7.48-7.51 (m, 2H) ppm. <sup>13</sup>C-NMR (125 MHz, DMSO-*d*<sub>6</sub>):  $\delta = 22.1, 22.4, 25.8, 32.8, 88.0, 116.7, 118.3, 128.0, 128.5, 128.6, 136.4, 153.9, 157.9, 160.9$  ppm.

### *2-Amino-4-(4-methoxyphenyl)-5,6,7,8-tetrahydroquinoline-3-carbonitrile*<sup>2, 4-7</sup> (**2a**)

With 47%, the pale yellow powder was produced.  $R_f = 0.51$  (*n*-Hexane-Ethyl acetate = 5:5); Mp. = 239-240 °C; <sup>1</sup>H-NMR (500 MHz, DMSO):  $\delta = 1.55$ -1.59 (m, 2H), 1.70-1.75 (m, 2H), 2.23 (t,  $J = 6.5$  Hz, 2H), 2.69 (t,  $J = 6.5$  Hz, 2H), 3.81 (s, 3H), 6.51 (s, 2H), 7.04 (d,  $J = 8.5$  Hz, 2H), 7.22 (d,  $J = 8.5$  Hz, 2H) ppm. <sup>13</sup>C-NMR (125 MHz, DMSO):  $\delta = 22.1, 22.5, 25.9, 32.8, 55.1, 88.3, 113.9, 116.9, 118.6, 128.5, 129.6, 153.7, 157.9, 159.3, 160.8$  ppm.

*2-Amino-4-(4-chlorophenyl)-5,6,7,8-tetrahydroquinoline-3-carbonitrile*<sup>2-7</sup> (**3a**)

With 33%, the yellow powder was produced.  $R_f = 0.53$  (*n*-Hexane-Ethyl acetate = 5:5); Mp. = 266-268 °C; <sup>1</sup>H-NMR (500 MHz, DMSO-*d*<sub>6</sub>):  $\delta = 1.56$ -1.61 (m, 2H), 1.71-1.75 (m, 2H), 2.19 (t,  $J = 6.5$  Hz, 2H), 2.70 (t,  $J = 6.5$  Hz, 2H), 6.60 (s, 2H), 7.34 (d,  $J = 8.5$  Hz, 2H), 7.57 (d,  $J = 8.5$  Hz, 2H) ppm. <sup>13</sup>C-NMR (125 MHz, DMSO-*d*<sub>6</sub>):  $\delta = 22.0, 22.4, 25.8, 32.8, 87.8, 116.5, 118.2, 128.7, 130.1, 133.4, 135.2, 152.7, 157.9, 161.1$  ppm.

*2-Amino-4-(4-fluorophenyl)-5,6,7,8-tetrahydroquinoline-3-carbonitrile*<sup>5</sup> (**4a**)

With 58%, the pale yellow powder was produced.  $R_f = 0.52$  (*n*-Hexane-Ethyl acetate = 5:5); Mp. = 259-260 °C; <sup>1</sup>H-NMR (500 MHz, DMSO):  $\delta = 1.56$ -1.61 (m, 2H), 1.71-1.75 (m, 2H), 2.19 (t,  $J = 6.5$  Hz, 2H), 2.70 (t,  $J = 6.5$  Hz, 2H), 6.58 (s, 2H), 7.33-7.37 (m, 4H) ppm. <sup>13</sup>C-NMR (125 MHz, DMSO-*d*<sub>6</sub>):  $\delta = 22.1, 22.4, 25.8, 32.8, 88.1, 115.7$  (d,  $J = 21.3$  Hz), 116.6, 118.4, 130.5 (d,  $J = 8.8$  Hz), 132.7 (d,  $J = 2.5$  Hz), 153.0, 157.9, 161.0, 162.1 (d,  $J = 243.8$  Hz) ppm.

*2-Amino-4-(2-chlorophenyl)-5,6,7,8-tetrahydroquinoline-3-carbonitrile*<sup>5, 6</sup> (**5a**)

With 46%, the pale yellow powder was produced.  $R_f = 0.59$  (*n*-Hexane-Ethyl acetate = 5:5); Mp. = 259-251 °C; <sup>1</sup>H-NMR (500 MHz, DMSO-*d*<sub>6</sub>):  $\delta = 1.57$ -1.63 (m, 2H), 1.70-1.75 (m, 2H), 2.03-2.14 (m, 2H), 2.66-2.77 (m, 2H), 6.66 (s, 2H), 7.31-7.32 (m, 1H), 7.48-7.50 (m, 2H), 7.62-7.63 (m, 1H) ppm. <sup>13</sup>C-NMR (125 MHz, DMSO-*d*<sub>6</sub>):  $\delta = 22.1, 22.2, 25.2, 32.7, 87.9, 116.1, 118.5, 127.7, 129.6, 129.9, 130.5, 131.0, 135.2, 151.3, 157.8, 161.3$  ppm.

*2-Amino-4-(2-fluorophenyl)-5,6,7,8-tetrahydroquinoline-3-carbonitrile* (**6a**)

With 44%, the yellow powder was produced.  $R_f = 0.58$  (*n*-Hexane-Ethyl acetate = 5:5); Mp. = 254-256 °C; <sup>1</sup>H-NMR (500 MHz, DMSO-*d*<sub>6</sub>):  $\delta = 1.58$ -1.63 (m, 2H), 1.71-1.76 (m, 2H), 2.09-2.24 (m, 2H), 2.66-2.77 (m, 2H), 6.66 (s, 2H), 7.33-7.39 (m, 3H), 7.52-

7.56 (m, 1H) ppm.  $^{13}\text{C}$ -NMR (125 MHz, DMSO- $d_6$ ):  $\delta$  = 22.0, 22.2, 25.3, 32.7, 88.3, 115.9 (d,  $J$  = 21.3 Hz), 116.2, 118.9, 123.6 (d,  $J$  = 17.5 Hz), 124.9 (d,  $J$  = 2.5 Hz), 129.6 (d,  $J$  = 2.5 Hz), 131.3 (d,  $J$  = 8.8 Hz), 148.0, 157.8, 158.2 (d,  $J$  = 242.5 Hz), 161.3 ppm.

*2-Amino-4-(4-bromophenyl)-5,6,7,8-tetrahydroquinoline-3-carbonitrile*<sup>4, 5</sup> (**7a**)

With 53%, the pale yellow powder was produced.  $R_f$  = 0.53 (*n*-Hexane-Ethyl acetate = 5:5); Mp. = 299-301 °C;  $^1\text{H}$ -NMR (500 MHz, DMSO- $d_6$ ):  $\delta$  = 1.58–1.62 (m, 2H), 1.71–1.75 (m, 2H), 2.19 (t,  $J$  = 6.5 Hz, 2H), 2.70 (t,  $J$  = 6.5 Hz, 2H), 6.61 (s, 2H), 7.27 (d,  $J$  = 8.5 Hz, 2H), 7.70 (d,  $J$  = 8.5 Hz, 2H) ppm.  $^{13}\text{C}$ -NMR (125 MHz, DMSO- $d_6$ ):  $\delta$  = 22.0, 22.4, 25.8, 32.8, 87.7, 116.5, 118.1, 122.1, 130.4, 131.6, 135.6, 152.7, 157.9, 161.1 ppm.

*2-Amino-4-(*p*-tolyl)-5,6,7,8-tetrahydroquinoline-3-carbonitrile*<sup>4, 6, 7</sup> (**8a**)

With 44%, the pale yellow powder was produced.  $R_f$  = 0.57 (*n*-Hexane-Ethyl acetate = 5:5); Mp. = 258-260 °C;  $^1\text{H}$ -NMR (500 MHz, DMSO- $d_6$ ):  $\delta$  = 1.54–1.59 (m, 2H), 1.70–1.75 (m, 2H), 2.20 (t,  $J$  = 6.5 Hz, 2H), 2.37 (s, 3H), 2.69 (t,  $J$  = 6.5 Hz, 2H), 6.52 (s, 2H), 7.16 (d,  $J$  = 8.0 Hz, 2H), 7.30 (d,  $J$  = 8.0 Hz, 2H) ppm.  $^{13}\text{C}$ -NMR (125 MHz, DMSO- $d_6$ ):  $\delta$  = 20.8, 22.1, 22.5, 25.9, 32.8, 88.1, 116.7, 118.4, 128.0, 129.1, 133.4, 137.9, 154.0, 157.9, 160.8 ppm.

*2-Amino-4-(furan-2-yl)-5,6,7,8-tetrahydroquinoline-3-carbonitrile* (**9a**)

With 48%, the yellow powder was produced.  $R_f$  = 0.58 (*n*-Hexane-Ethyl acetate = 5:5); Mp. = 216-218 °C;  $^1\text{H}$ -NMR (500 MHz, DMSO- $d_6$ ):  $\delta$  = 0.78-0.82 (m, 2H), 0.88-0.92 (m, 2H), 1.68 (t,  $J$  = 6.0 Hz, 2H), 1.86 (t,  $J$  = 6.5 Hz, 2H), 5.74 (s, 2H), 5.86 (dd,  $J$  = 1.5 Hz & 3.5 Hz, 1H), 6.06 (d,  $J$  = 3.5 Hz, 1H), 7.08 (d,  $J$  = 1.5 Hz, 1H) ppm.  $^{13}\text{C}$ -NMR (125 MHz, DMSO- $d_6$ ):  $\delta$  = 21.9, 22.5, 26.1, 33.0, 85.7, 111.7, 113.7, 116.9, 118.3,

141.1, 144.5, 147.4, 158.5, 161.7 ppm.

*2-Amino-4,6-diphenylnicotinonitrile*<sup>2-4, 8-10</sup> (**10a**)

With 15%, the white powder was produced.  $R_f = 0.84$  (*n*-Hexane-Ethyl acetate = 5:5);  
Mp. = 186-187 °C; <sup>1</sup>H-NMR (500 MHz, DMSO-*d*<sub>6</sub>):  $\delta = 7.01$  (s, 2H), 7.28 (s, 1H),  
7.48-7.51 (m, 3H), 7.54-7.58 (m, 3H), 7.68 (dd,  $J = 2.0$  Hz & 8.0 Hz, 2H), 8.12-8.14  
(m, 2H) ppm. <sup>13</sup>C-NMR (125 MHz, DMSO-*d*<sub>6</sub>):  $\delta = 86.7, 109.3, 117.0, 127.3, 128.4,$   
128.7, 129.6, 130.1, 137.0, 137.6, 154.9, 158.6, 160.9 ppm.

*2-Amino-4-(4-methoxyphenyl)-6-phenylnicotinonitrile*<sup>2, 8-10</sup> (**11a**)

With 12%, the white powder was produced.  $R_f = 0.78$  (*n*-Hexane-Ethyl acetate = 5:5);  
Mp. = 188-190 °C; <sup>1</sup>H-NMR (500 MHz, DMSO-*d*<sub>6</sub>):  $\delta = 3.84$  (s, 3H), 6.95 (s, 2H), 7.11  
(d,  $J = 8.5$  Hz, 2H), 7.25 (s, 1H), 7.47-7.49 (m, 3H), 7.66 (d,  $J = 8.5$  Hz, 2H), 8.12 (dd,  
 $J = 2.5$  & 7.5 Hz, 2H) ppm. <sup>13</sup>C-NMR (125 MHz, DMSO-*d*<sub>6</sub>):  $\delta = 55.3, 86.4, 109.0,$   
114.2, 117.3, 127.2, 128.6, 129.1, 129.8, 130.0, 137.7, 154.5, 158.5, 160.4, 161.0 ppm.

*2-Amino-4-(4-chlorophenyl)-6-phenylnicotinonitrile*<sup>2-4, 8-10</sup> (**12a**)

With 46%, the white powder was produced.  $R_f = 0.84$  (*n*-Hexane-Ethyl acetate = 5:5);  
Mp. = 185-186 °C; <sup>1</sup>H-NMR (500 MHz, DMSO-*d*<sub>6</sub>):  $\delta = 7.05$  (s, 2H), 7.29 (s, 1H),  
7.48-7.51 (m, 3H), 7.63 (d,  $J = 8.5$  Hz, 2H), 7.72 (d,  $J = 8.5$  Hz, 2H), 8.12-8.14 (m, 2H)  
ppm. <sup>13</sup>C-NMR (125 MHz, DMSO-*d*<sub>6</sub>):  $\delta = 86.5, 109.1, 116.8, 127.3, 128.6, 128.7,$   
130.1, 130.3, 134.5, 135.8, 137.5, 153.6, 158.7, 160.8 ppm.

*2-Amino-4-(4-fluorophenyl)-6-phenylnicotinonitrile*<sup>9, 10</sup> (**13a**)

With 19%, the white powder was produced.  $R_f = 0.84$  (*n*-Hexane-Ethyl acetate = 5:5);  
Mp. = 164-166 °C; ; <sup>1</sup>H-NMR (500 MHz, DMSO-*d*<sub>6</sub>):  $\delta = 7.0$  (s, 2H), 7.28 (s, 1H),  
7.38-7.43 (m, 2H), 7.48-7.51 (m, 3H), 7.73-7.77 (m, 2H), 8.12-8.14 (m, 2H) ppm. <sup>13</sup>C-  
NMR (125 MHz, DMSO-*d*<sub>6</sub>):  $\delta = 86.6, 109.3, 115.7$  (d,  $J = 22.5$  Hz), 117.0, 127.3,

128.6, 130.1, 130.8 (d,  $J = 8.8$  Hz), 133.4 (d,  $J = 2.5$  Hz), 137.5, 153.8, 158.7, 160.8, 162.9 (d,  $J = 245.0$  Hz) ppm.

*2-Amino-6-phenyl-4-(4-bromophenyl)nicotinonitrile*<sup>4, 8, 10</sup> (**14a**)

With 36%, the white powder was produced.  $R_f = 0.84$  (*n*-Hexane-Ethyl acetate = 5:5); Mp. = 183-185 °C; <sup>1</sup>H-NMR (500 MHz, DMSO-*d*<sub>6</sub>):  $\delta = 7.05$  (s, 2H), 7.28 (s, 1H), 7.48-7.51 (m, 3H), 7.64 (d,  $J = 8.5$  Hz, 2H), 7.77 (d,  $J = 8.5$  Hz, 2H), 8.12-8.14 (m, 2H) ppm. <sup>13</sup>C-NMR (125 MHz, DMSO-*d*<sub>6</sub>):  $\delta = 86.4, 109.1, 116.8, 123.2, 127.3, 128.6, 130.2, 130.5, 131.7, 136.1, 137.5, 153.7, 158.8, 160.8$  ppm.

*2-Amino-6-phenyl-4-(p-tolyl)nicotinonitrile*<sup>2-4, 8-10</sup> (**15a**)

With 31%, the white powder was produced.  $R_f = 0.84$  (*n*-Hexane-Ethyl acetate = 5:5); Mp. = 181-183 °C; <sup>1</sup>H-NMR (500 MHz, DMSO-*d*<sub>6</sub>):  $\delta = 2.40$  (s, 3H), 6.97 (s, 2H), 7.25 (s, 1H), 7.37 (d,  $J = 7.5$  Hz, 2H), 7.47-7.50 (m, 3H), 7.59 (d,  $J = 7.5$  Hz, 2H), 8.11-8.13 (m, 2H) ppm. <sup>13</sup>C-NMR (125 MHz, DMSO-*d*<sub>6</sub>):  $\delta = 20.8, 86.5, 109.1, 117.1, 127.2, 128.2, 128.6, 129.3, 130.0, 134.1, 137.6, 139.3, 154.8, 158.5, 160.9$  ppm.

2.4.16. *2-Amino-7,7-dimethyl-5-oxo-4-phenyl-5,6,7,8-tetrahydro-4H-chromene-3-carbonitrile*<sup>11-17</sup> (**16b**)

With 50%, the pale yellow powder was produced.  $R_f = 0.52$  (*n*-Hexane-Ethyl acetate = 5:5); Mp. = 233-234 °C; <sup>1</sup>H-NMR (500 MHz, DMSO-*d*<sub>6</sub>):  $\delta = 0.96$  (s, 3H), 1.04 (s, 3H), 2.11 (d,  $J = 16.0$  Hz, 1H), 2.26 (d,  $J = 16.0$  Hz, 1H), 2.48 - 2.58 (m, 2H), 4.17 (s, 1H), 7.00 (s, 2H), 7.14 (d,  $J = 7.5$  Hz, 2H), 7.18 (t,  $J = 7.5$  Hz, 1H), 7.28 (t,  $J = 7.5$  Hz, 2H) ppm. <sup>13</sup>C-NMR (125 MHz, DMSO-*d*<sub>6</sub>):  $\delta = 26.8, 28.4, 31.8, 35.6, 50.0, 58.3, 112.7, 119.7, 126.5, 127.1, 128.3, 144.7, 158.5, 162.5, 195.6$  ppm.

*2-Amino-4-(4-methoxyphenyl)-7,7-dimethyl-5-oxo-5,6,7,8-tetrahydro-4H-chromene-3-carbonitrile*<sup>11, 12, 16, 17</sup> (**17b**)



With 14%, the pale yellow powder was produced.  $R_f = 0.48$  (*n*-Hexane-Ethyl acetate = 5:5); Mp. = 200-202 °C;  $^1\text{H-NMR}$  (500 MHz,  $\text{DMSO-}d_6$ ):  $\delta = 0.94$  (s, 3H), 1.03 (s, 3H), 2.08 (d,  $J = 16.0$  Hz, 1H), 2.24 (d,  $J = 16.0$  Hz, 1H), 2.45–2.45 (m, 2H), 3.71 (s, 3H), 4.12 (s, 1H), 6.84 (d,  $J = 8.5$  Hz, 2H), 6.95 (s, 2H), 7.05 (d,  $J = 8.5$  Hz, 2H) ppm.  $^{13}\text{C-NMR}$  (125 MHz,  $\text{DMSO-}d_6$ ):  $\delta = 26.8, 28.4, 31.8, 34.7, 50.0, 55.0, 58.6, 113.0, 113.7, 119.8, 128.2, 136.8, 157.9, 158.4, 162.1, 195.0$  ppm.

*2-Amino-4-(4-fluorophenyl)-7,7-dimethyl-5-oxo-5,6,7,8-tetrahydro-4H-chromene-3-carbonitrile*<sup>11, 13-17</sup> (**18b**)

With 75%, the pale yellow powder was produced.  $R_f = 0.48$  (*n*-Hexane-Ethyl acetate = 5:5); Mp. = 184-185 °C;  $^1\text{H-NMR}$  (500 MHz,  $\text{DMSO-}d_6$ ):  $\delta = 0.94$  (s, 3H), 1.03 (s, 3H), 2.11 (d,  $J = 16.0$  Hz, 1H), 2.25 (d,  $J = 16.0$  Hz, 1H), 2.47–2.54 (m, 2H), 3.71 (s, 3H), 4.20 (s, 1H), 7.03 (s, 2H), 7.10 (t,  $J = 8.5$  Hz, 2H), 7.16–7.19 (m, 2H) ppm.  $^{13}\text{C-NMR}$  (125 MHz,  $\text{DMSO}$ ):  $\delta = 26.8, 28.3, 31.8, 34.9, 50.0, 58.1, 112.6, 115.0$  (d,  $J = 21.3$  Hz), 119.6, 129.0 (d,  $J = 7.5$  Hz), 140.9 (d,  $J = 2.5$  Hz), 158.5, 160.9 (d,  $J = 241.3$  Hz), 162.5, 195.7 ppm.

*2-Amino-4-(2-chlorophenyl)-7,7-dimethyl-5-oxo-5,6,7,8-tetrahydro-4H-chromene-3-carbonitrile*<sup>11, 16, 17</sup> (**19b**)

With 7%, the pale yellow powder was produced.  $R_f = 0.51$  (*n*-Hexane-Ethyl acetate = 5:5); Mp. = 213-215 °C;  $^1\text{H-NMR}$  (500 MHz,  $\text{DMSO-}d_6$ ):  $\delta = 0.98$  (s, 3H), 1.04 (s, 3H), 2.08 (d,  $J = 16.0$  Hz, 1H), 2.25 (d,  $J = 16.0$  Hz, 1H), 2.47 – 2.57 (m, 2H), 4.69 (s, 1H), 7.03 (s, 2H), 7.16–7.22 (m, 2H), 7.27 (t,  $J = 7.0$  Hz, 1H), 7.36 (d,  $J = 8.0$  Hz, 1H) ppm.  $^{13}\text{C-NMR}$  (125 MHz,  $\text{DMSO-}d_6$ ):  $\delta = 26.9, 28.4, 31.8, 32.8, 49.9, 56.8, 111.8, 119.2, 127.4, 128.2, 129.4, 130.0, 132.1, 141.6, 158.7, 163.1, 195.5$  ppm.

*2-Amino-4-(2-fluorophenyl)-7,7-dimethyl-5-oxo-5,6,7,8-tetrahydro-4H-chromene-3-*

*carbonitrile*<sup>16</sup> (**20b**)

With 42%, the yellow powder was produced.  $R_f = 0.52$  (*n*-Hexane-Ethyl acetate = 5:5); Mp. = 237-239 °C; <sup>1</sup>H-NMR (500 MHz, DMSO-*d*<sub>6</sub>):  $\delta = 0.96$  (s, 3H), 1.04 (s, 3H), 2.08 (d,  $J = 16.0$  Hz, 1H), 2.27 (d,  $J = 16.0$  Hz, 1H), 2.45–2.57 (m, 2H), 4.45 (s, 1H), 7.03 (s, 2H), 7.09–7.13 (m, 2H), 7.17 (t,  $J = 7.5$  Hz, 1H), 7.21–7.25 (m, 1H) ppm. <sup>13</sup>C-NMR (125 MHz, DMSO-*d*<sub>6</sub>):  $\delta = 26.6, 28.5, 29.8, 31.8, 49.9, 56.7, 111.4, 115.4$  (d,  $J = 21.3$  Hz), 119.5, 124.4 (d,  $J = 2.5$  Hz), 128.6 (d,  $J = 7.5$  Hz), 129.7 (d,  $J = 3.8$  Hz), 131.2 (d,  $J = 12.5$  Hz), 158.8, 159.9 (d,  $J = 245.0$  Hz), 163.1, 195.6 ppm.

*2-Amino-4-(4-bromophenyl)-7,7-dimethyl-5-oxo-5,6,7,8-tetrahydro-4H-chromene-3-carbonitrile*<sup>11, 13, 15-17</sup> (**21b**)

With 8%, the pale yellow powder was produced.  $R_f = 0.53$  (*n*-Hexane-Ethyl acetate = 5:5); Mp. = 232-234 °C; <sup>1</sup>H-NMR (500 MHz, DMSO-*d*<sub>6</sub>):  $\delta = 1.00$  (s, 6H), 2.33 (s, 2H), 2.83 (s, 2H), 7.15 (d,  $J = 8.5$  Hz, 2H), 7.60 (d,  $J = 8.5$  Hz, 2H), 7.73 (s, 2H) ppm. <sup>13</sup>C-NMR (125 MHz, DMSO-*d*<sub>6</sub>):  $\delta = 27.7, 31.6, 46.9, 52.4, 90.8, 115.3, 115.6, 121.3, 129.5, 130.8, 137.3, 155.6, 160.3, 168.1, 194.0$  ppm.

*2-Amino-7,7-dimethyl-5-oxo-4-(p-tolyl)-5,6,7,8-tetrahydro-4H-chromene-3-carbonitrile*<sup>11, 15-17</sup> (**22b**)

With 6%, the pale yellow powder was produced.  $R_f = 0.57$  (*n*-Hexane-Ethyl acetate = 5:5); Mp. = 200-202 °C; <sup>1</sup>H-NMR (500 MHz, DMSO-*d*<sub>6</sub>):  $\delta = 1.00$  (s, 6H), 2.32 (s, 2H), 2.36 (s, 3H), 2.83 (s, 2H), 7.05 (d,  $J = 8.0$  Hz, 2H), 7.20 (d,  $J = 8.0$  Hz, 2H), 7.64 (s, 2H) ppm. <sup>13</sup>C-NMR (125 MHz, DMSO-*d*<sub>6</sub>):  $\delta = 20.9, 27.7, 31.6, 47.0, 52.6, 91.1, 115.5, 116.0, 127.3, 128.4, 135.0, 137.1, 156.9, 160.3, 167.9, 193.9$  ppm.

*2-Amino-4-(furan-2-yl)-7,7-dimethyl-5-oxo-5,6,7,8-tetrahydro-4H-chromene-3-carbonitrile*<sup>12, 17</sup> (**23b**)

With 28%, the pale yellow powder was produced.  $R_f = 0.49$  (*n*-Hexane-Ethyl acetate = 5:5); Mp. = 218-220 °C;  $^1\text{H-NMR}$  (500 MHz,  $\text{DMSO-}d_6$ ):  $\delta = 0.98$  (s, 3H), 1.04 (s, 3H), 2.17 (d,  $J = 16.0$  Hz, 1H), 2.29 (d,  $J = 16.0$  Hz, 1H), 2.43-2.54 (m, 2H), 4.32 (s, 1H), 6.05 (d,  $J = 3.0$  Hz, 1H), 6.32 (dd,  $J = 2.0$  Hz & 3.0 Hz, 1H), 7.48 (d,  $J = 2.0$  Hz, 1H) ppm.  $^{13}\text{C-NMR}$  (125 MHz,  $\text{DMSO-}d_6$ ):  $\delta = 26.6, 28.4, 29.0, 31.8, 49.9, 55.4, 105.1, 110.4, 110.5, 119.6, 141.8, 155.7, 159.3, 163.6, 195.4$  ppm.

## Section S3. NMR spectral

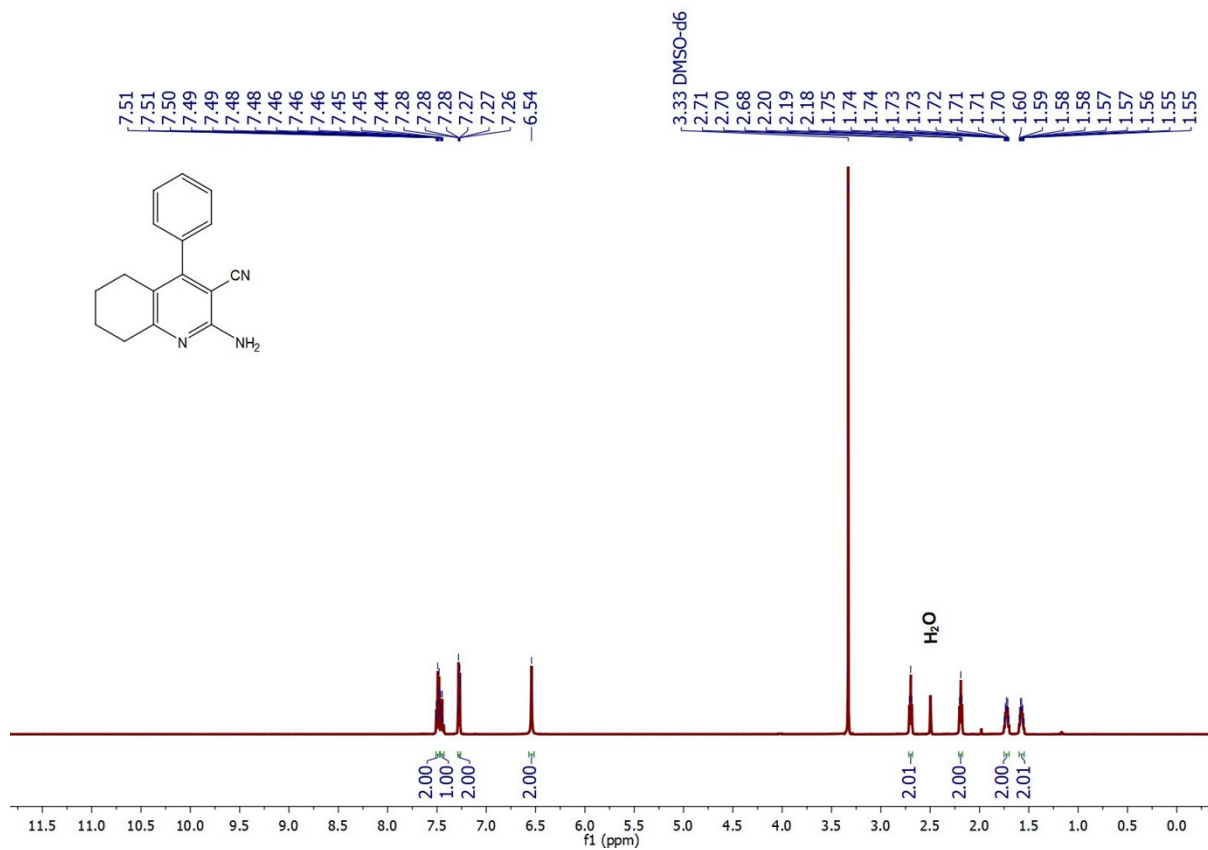

Figure S2-1.1. <sup>1</sup>H-NMR spectrum of 1a

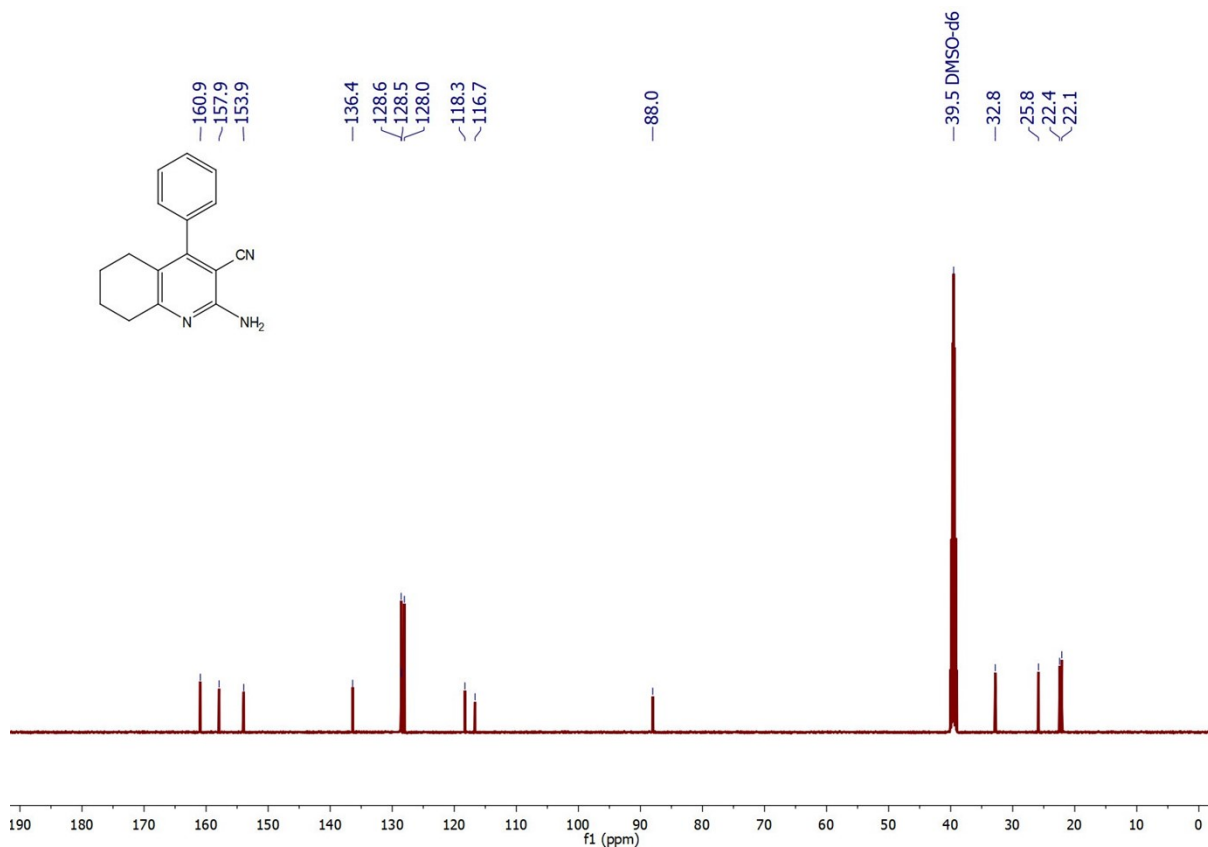

Figure S2-1.2. <sup>13</sup>C-NMR spectrum of 1a

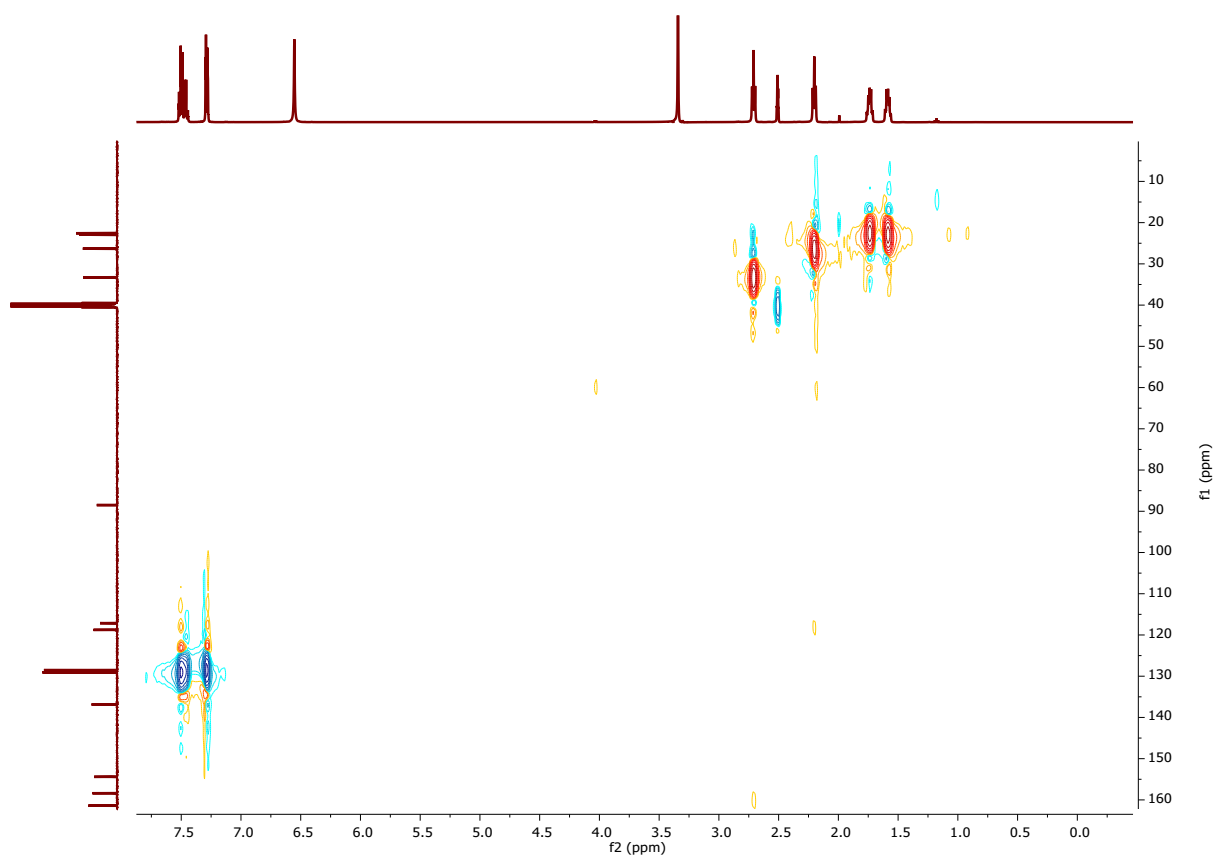

Figure S2-1.3. HSQC spectrum of 1a

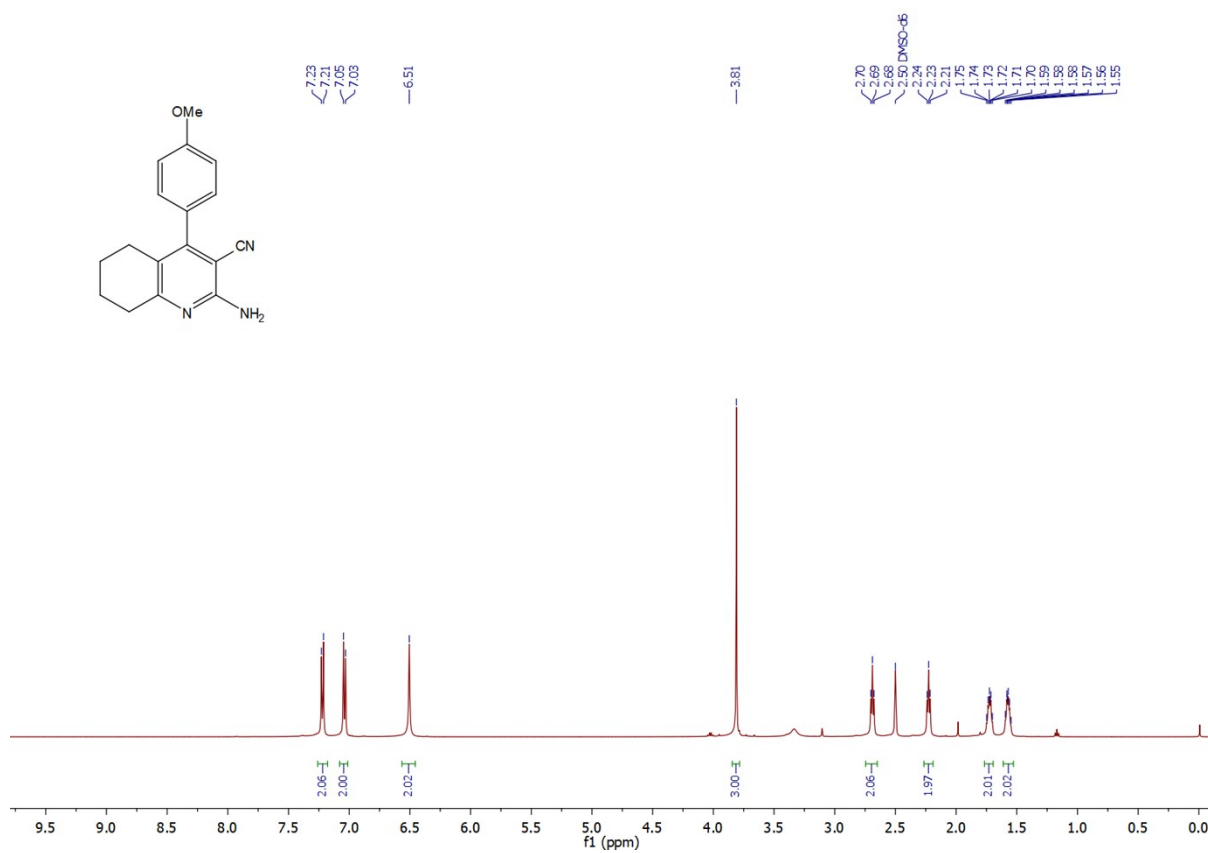

Figure S2-2.1.  $^1\text{H}$  -NMR spectrum of 2a

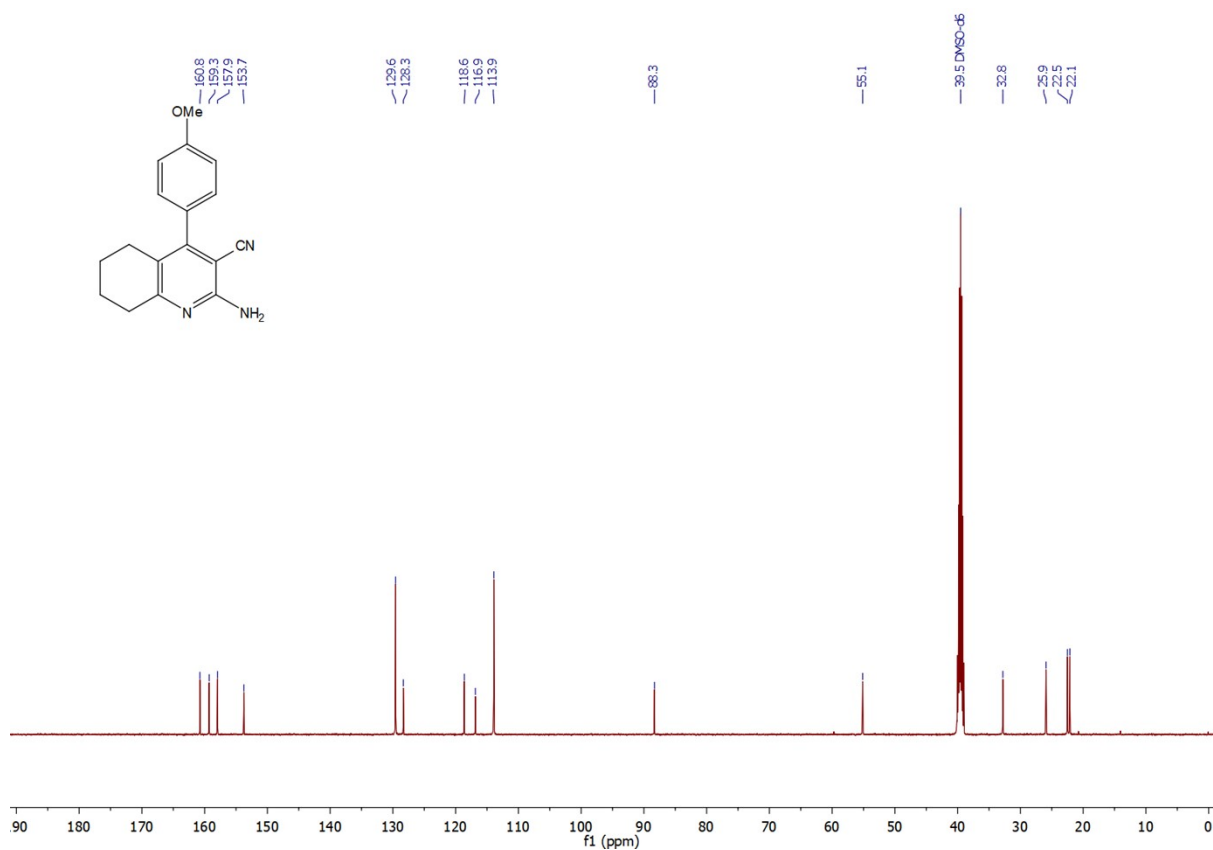

Figure S2-2.2.  $^{13}\text{C}$ -NMR spectrum of 2a

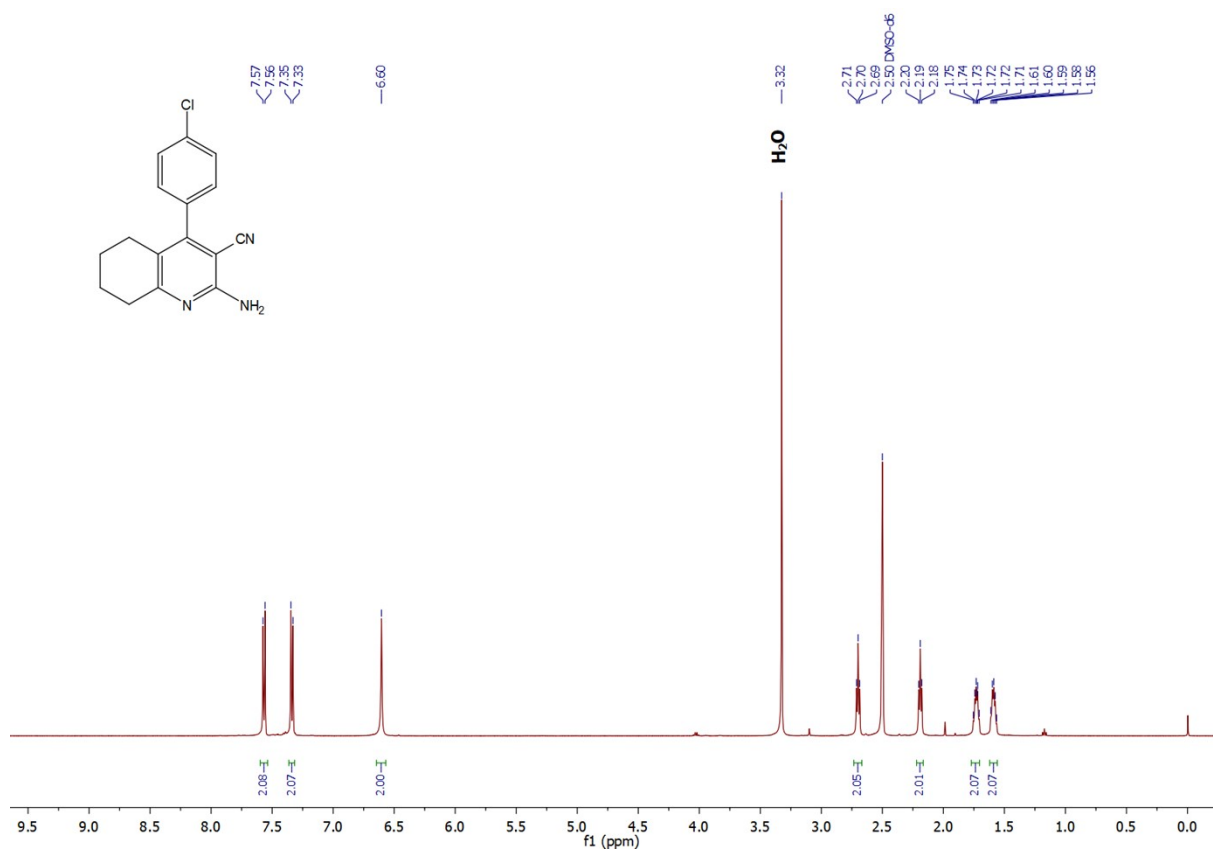

Figure S2-3.1.  $^1\text{H}$ -NMR spectrum of 3a

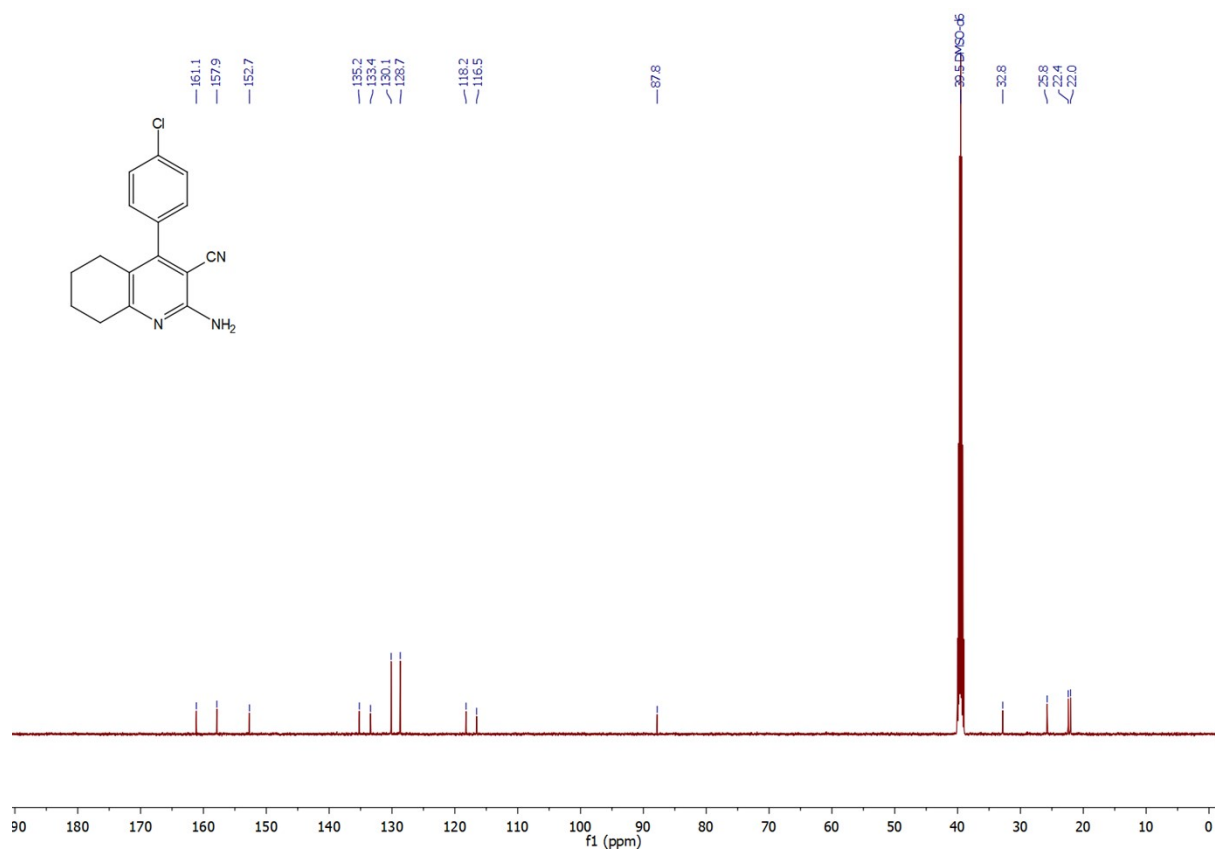

Figure S2-3.2.  $^{13}\text{C-NMR}$  spectrum of 3a

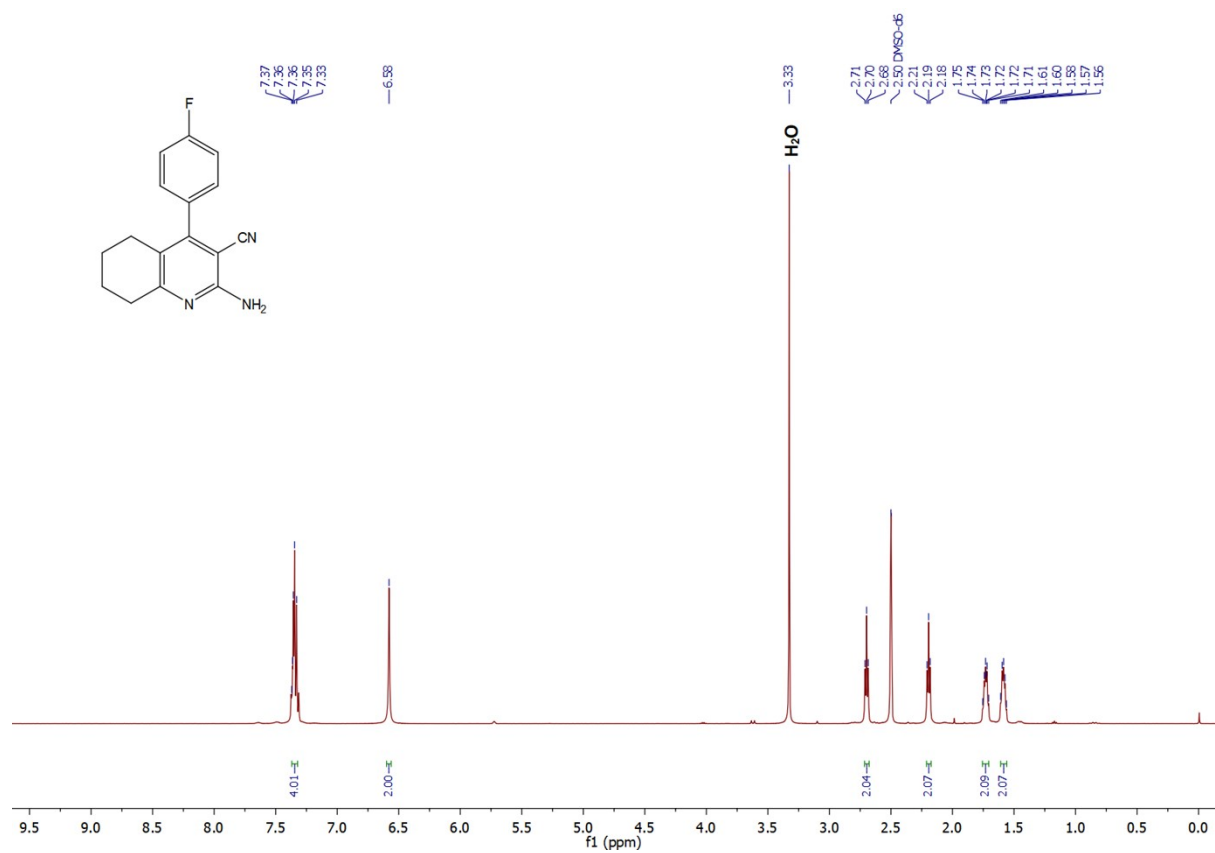

Figure S2-4.1.  $^1\text{H-NMR}$  spectrum of 4a

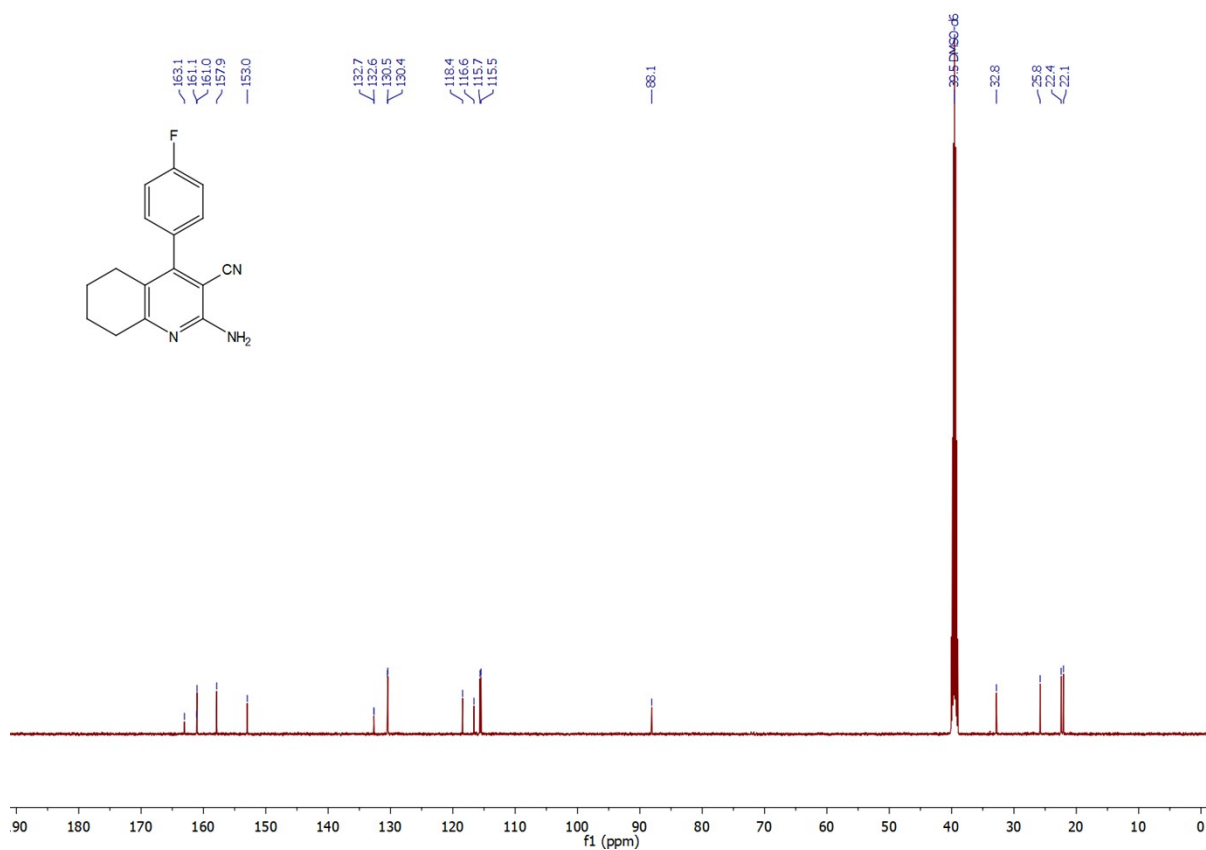

Figure S2-4.2.  $^{13}\text{C-NMR}$  spectrum of 4a

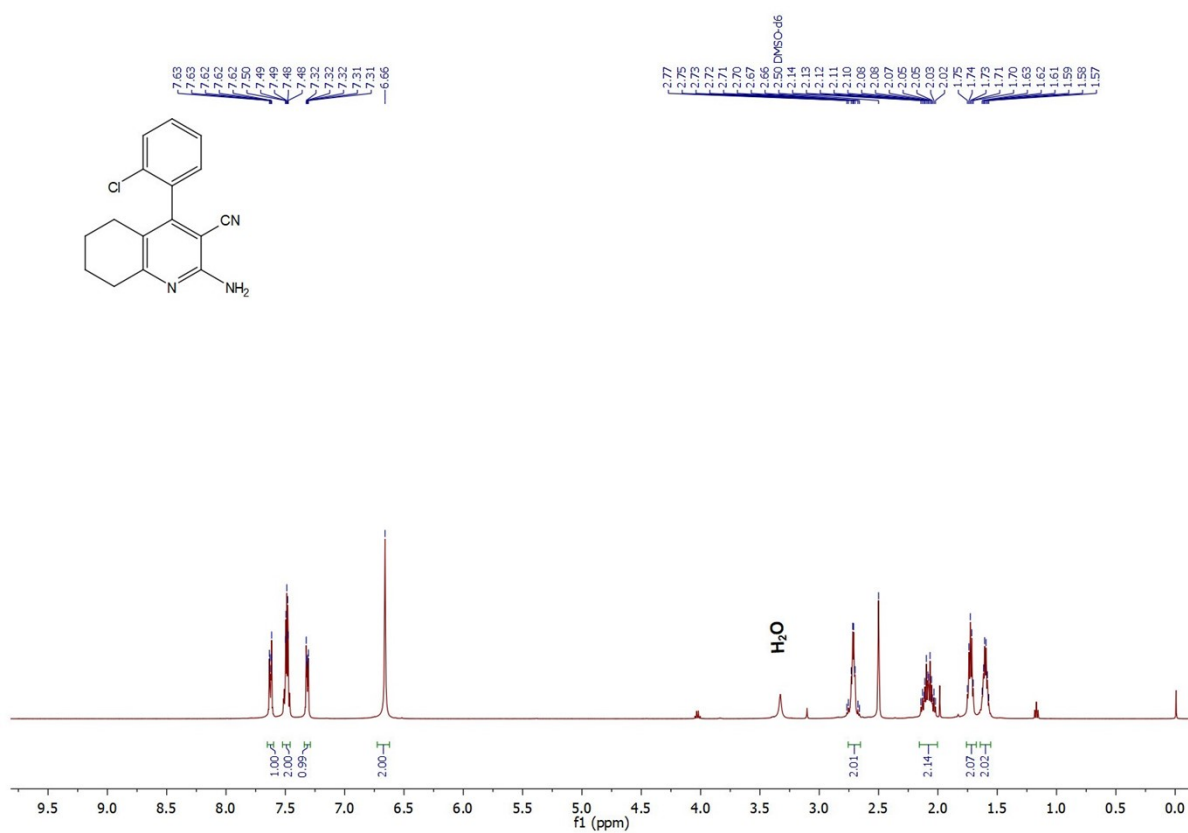

Figure S2-5.1.  $^1\text{H-NMR}$  spectrum of 5a



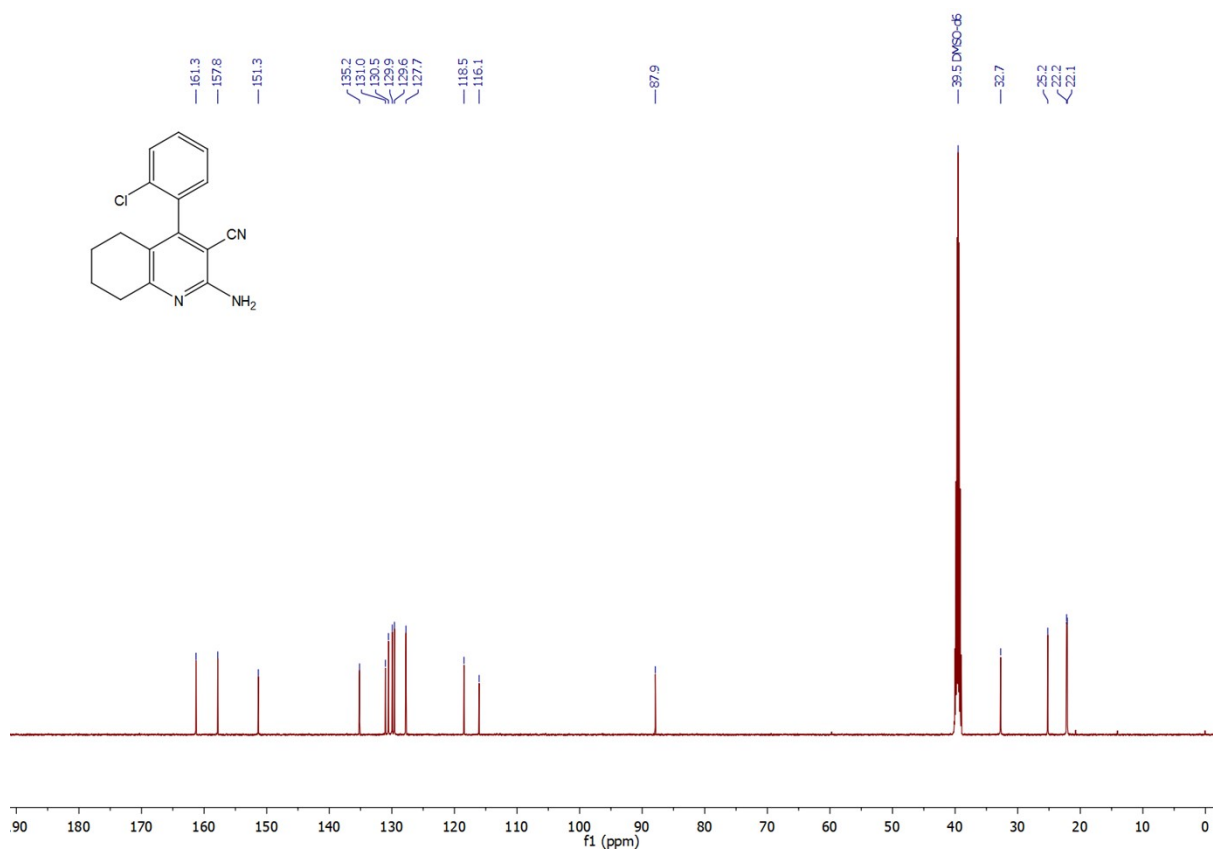

Figure S2-5.2.  $^{13}\text{C}$ -NMR spectrum of 5a

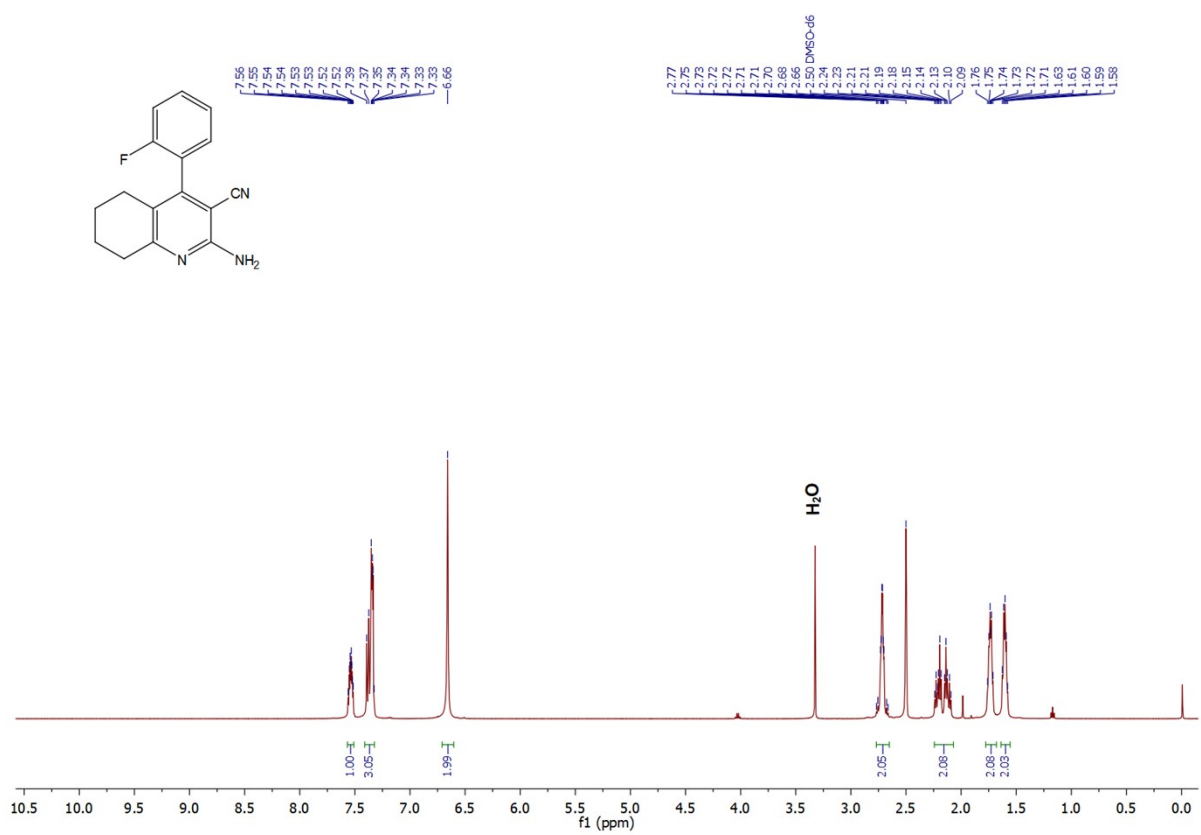

Figure S2-6.1.  $^1\text{H}$ -NMR spectrum of 6a

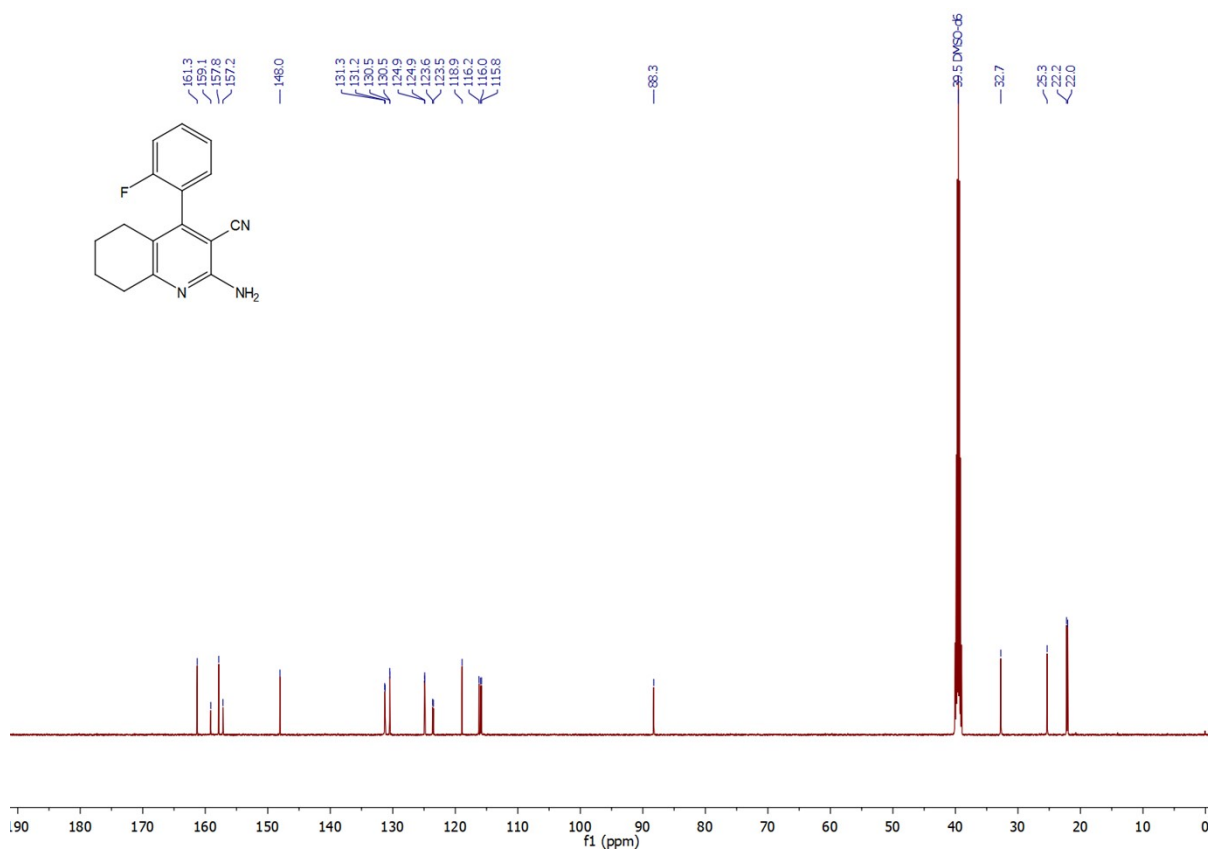

Figure S2-6.2.  $^{13}\text{C-NMR}$  spectrum of 6a

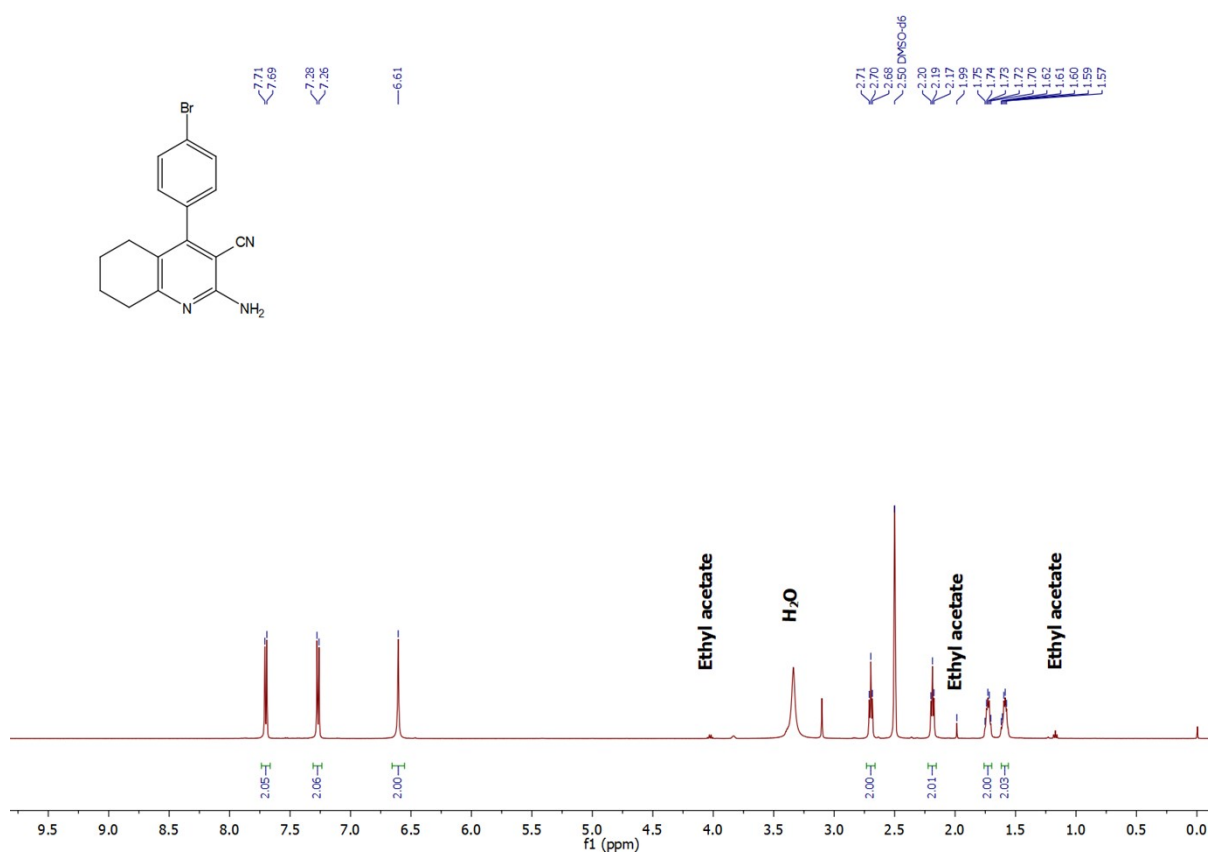

Figure S2-7.1.  $^1\text{H-NMR}$  spectrum of 7a

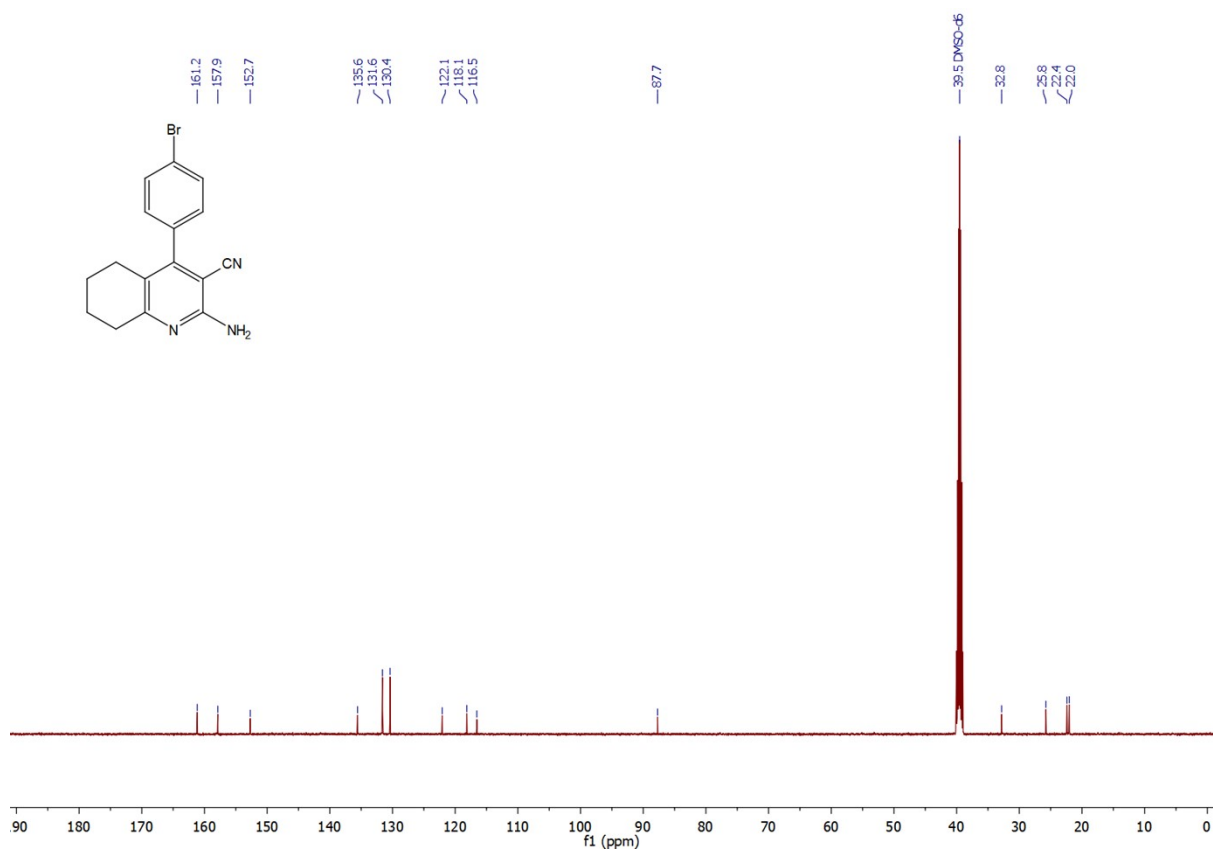

Figure S2-7.2.  $^{13}\text{C-NMR}$  spectrum of 7a

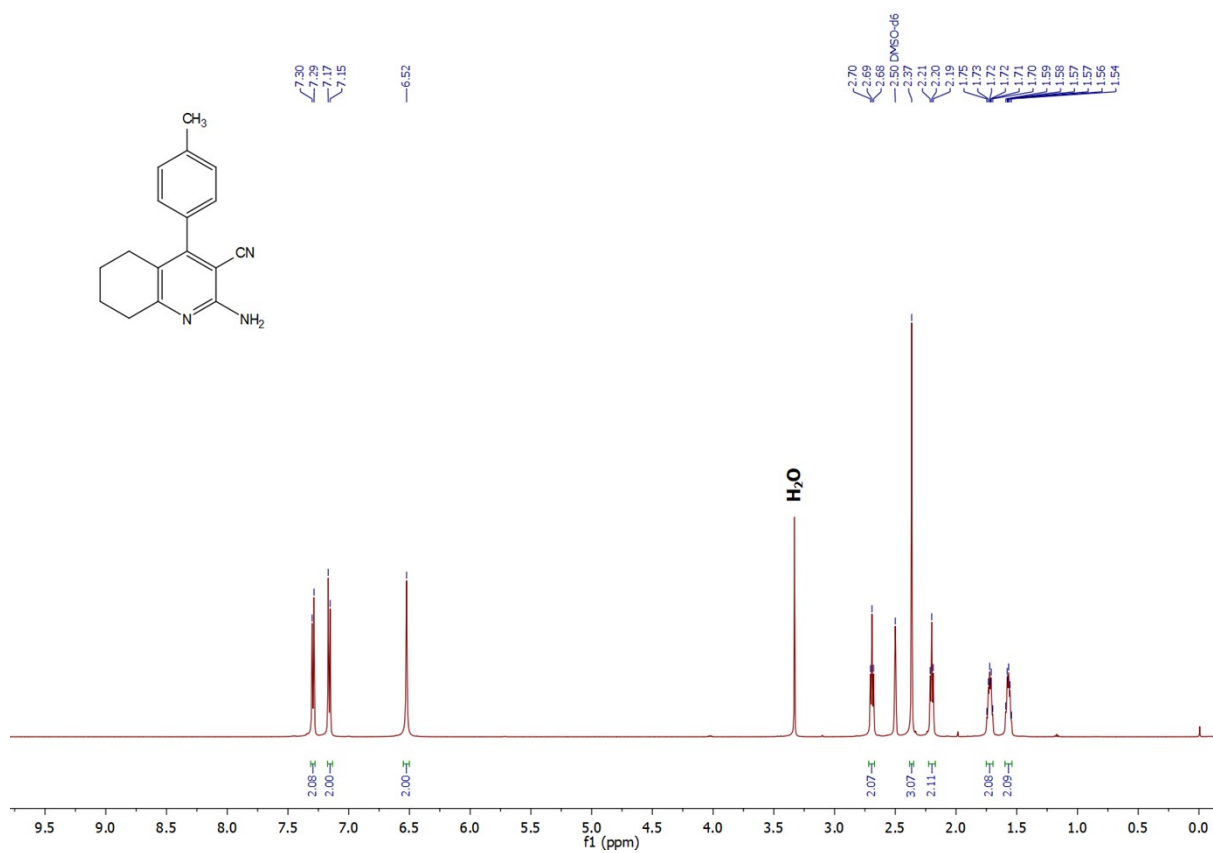

Figure S2-8.1.  $^1\text{H-NMR}$  spectrum of 8a

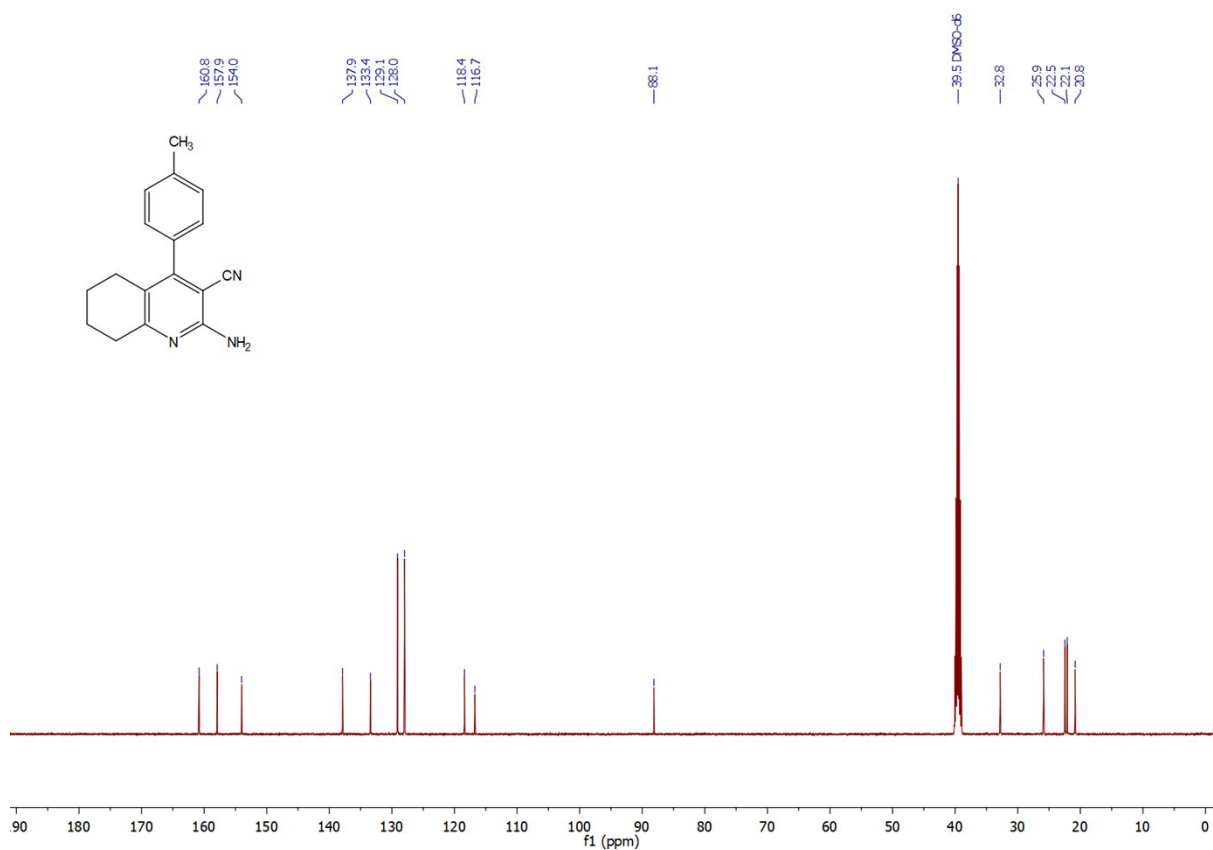

Figure S2-8.2.  $^{13}\text{C}$ -NMR spectrum of 8a

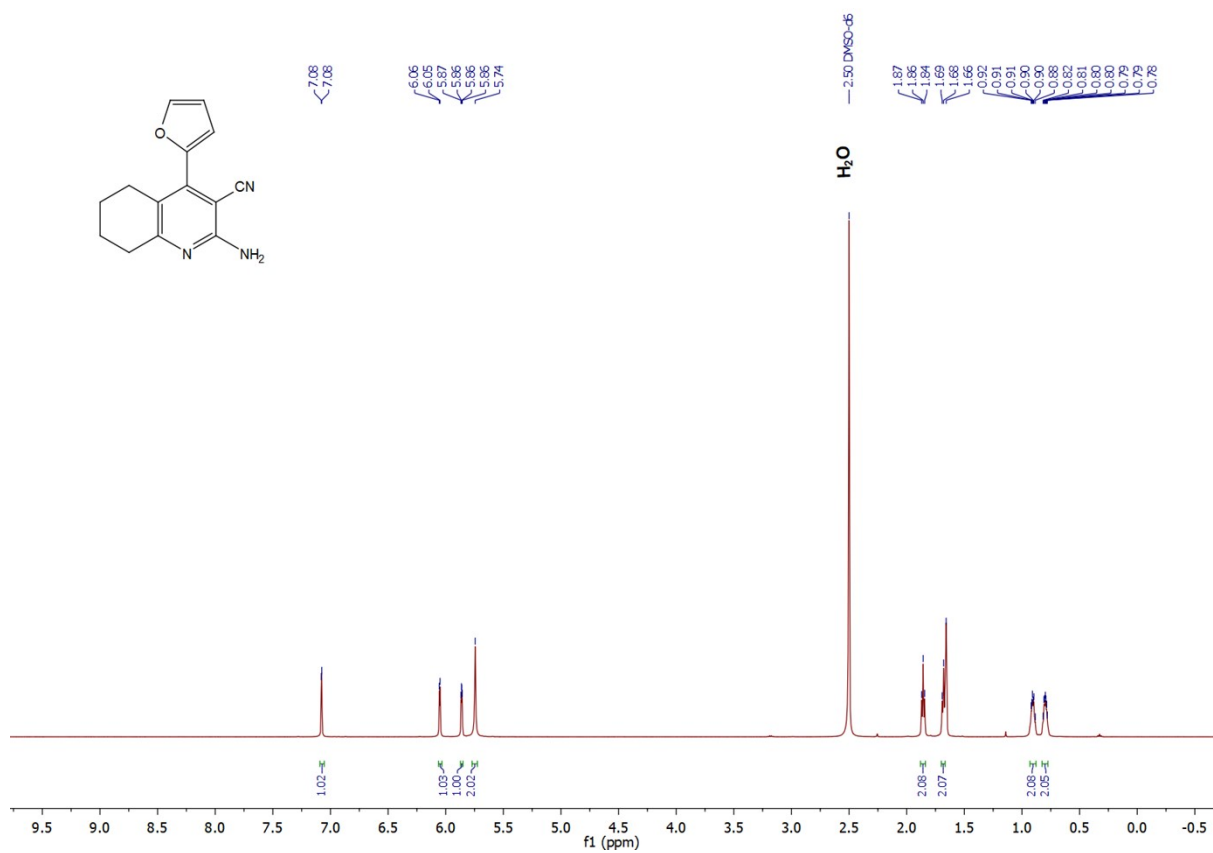

Figure S2-9.1.  $^1\text{H}$ -NMR spectrum of 9a



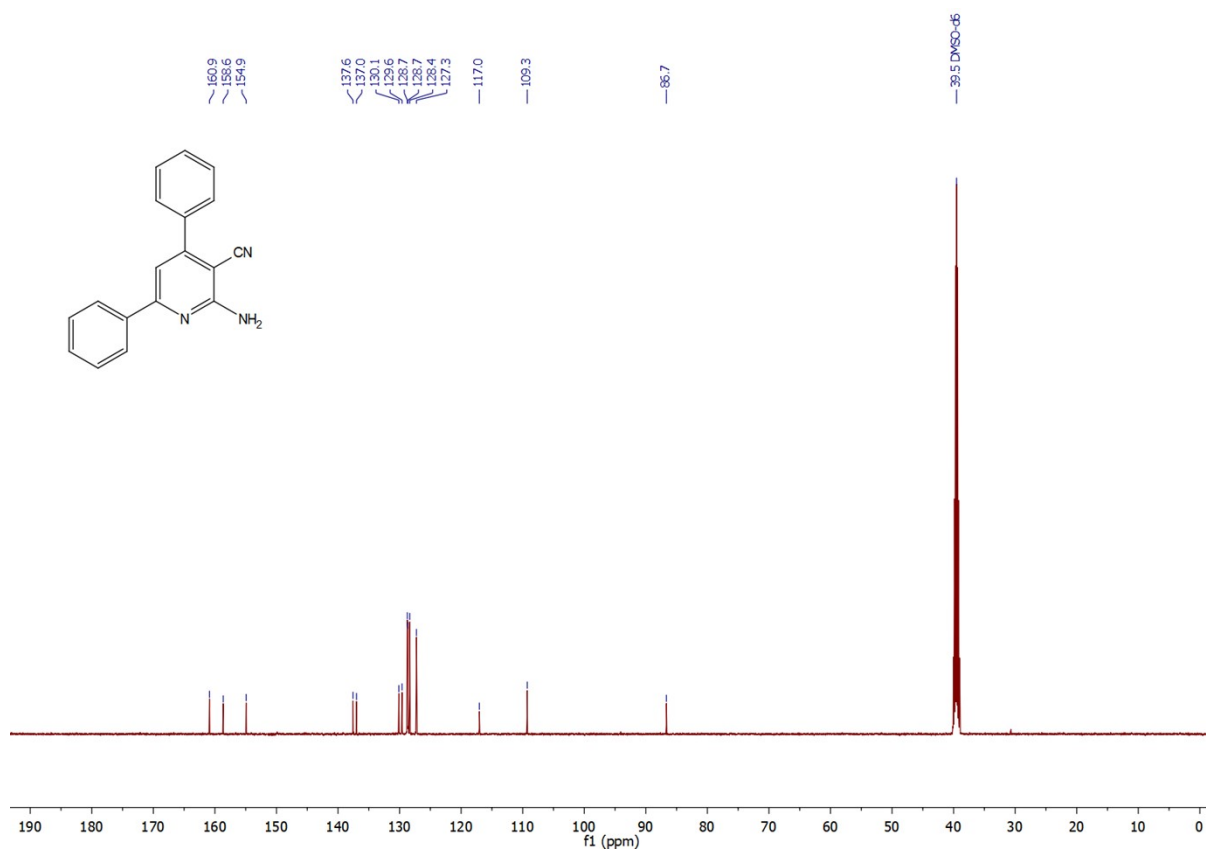

Figure S2-10.2.  $^{13}\text{C-NMR}$  spectrum of 10a

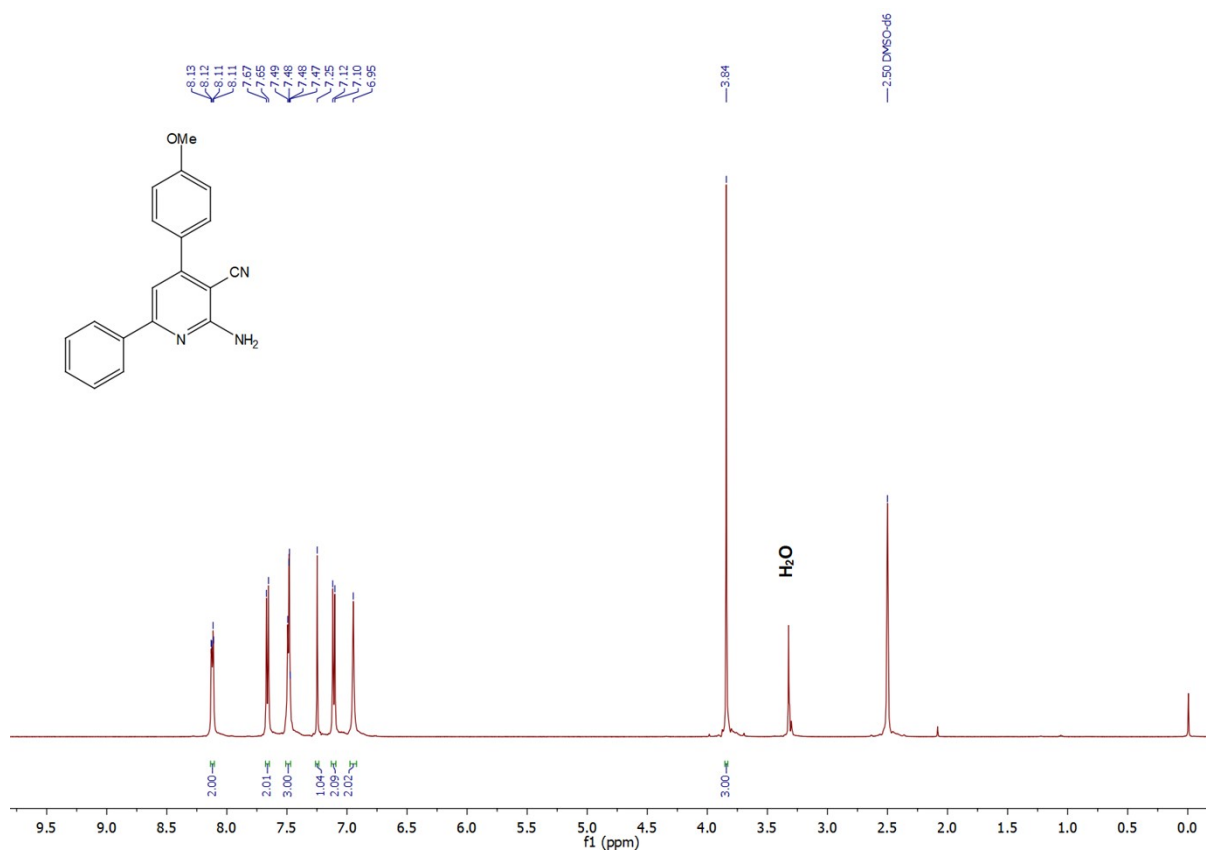

Figure S2-11.1.  $^1\text{H-NMR}$  spectrum of 11a

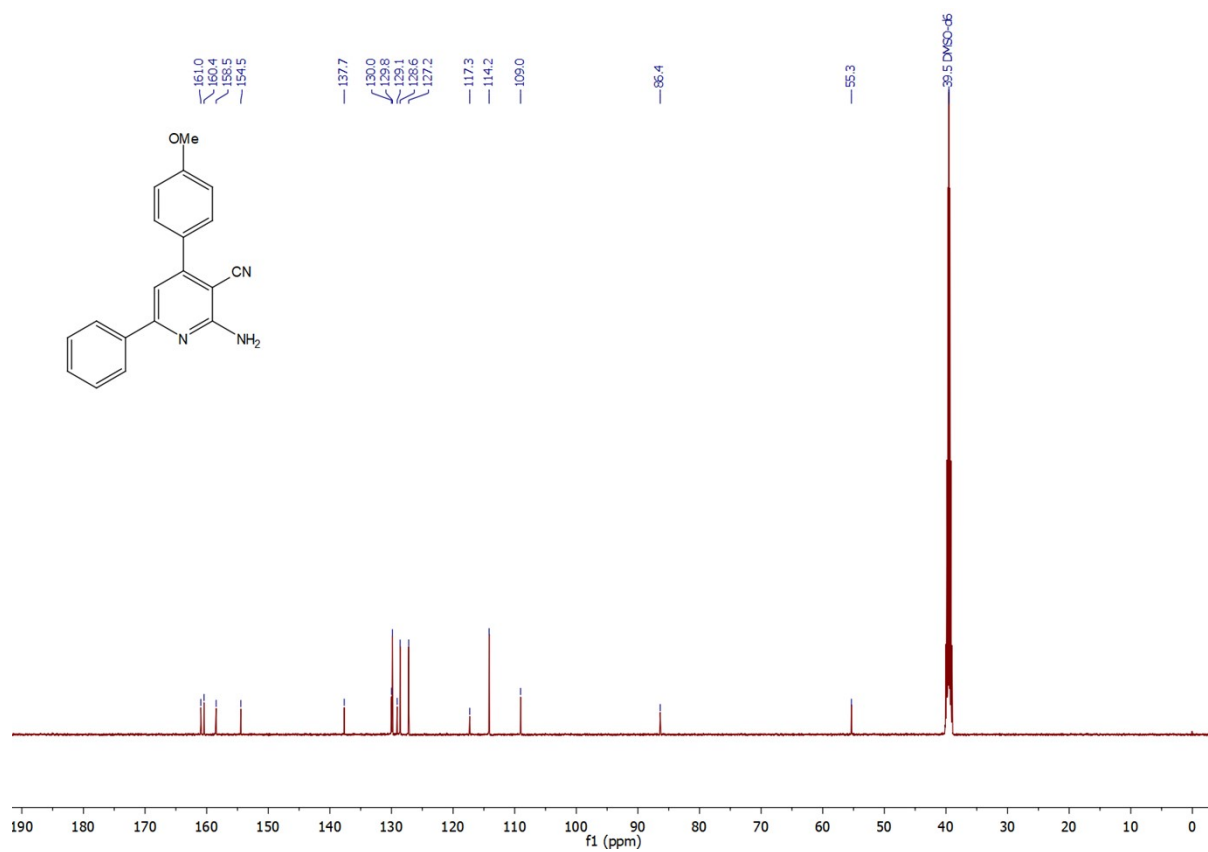

Figure S2-11.2.  $^{13}\text{C-NMR}$  spectrum of 11a

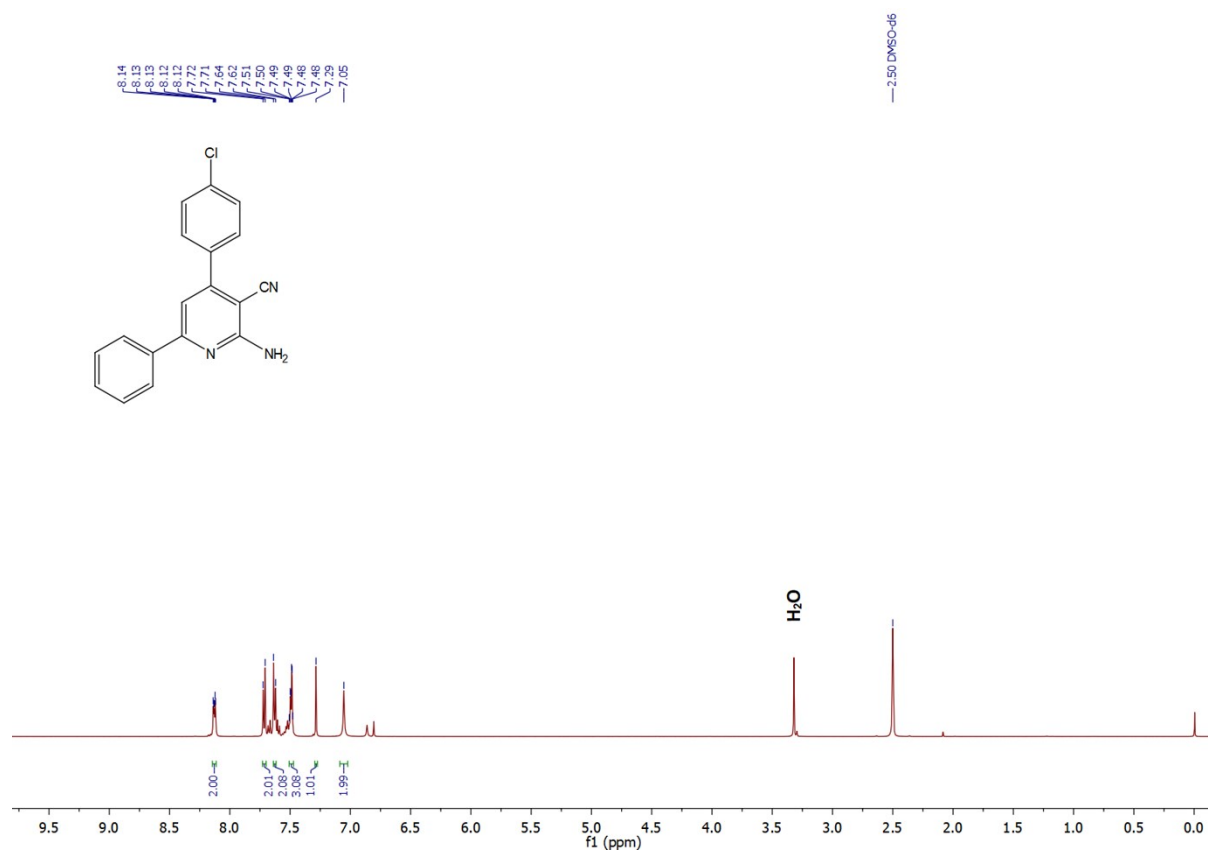

Figure S2-12.1.  $^1\text{H-NMR}$  spectrum of 12a

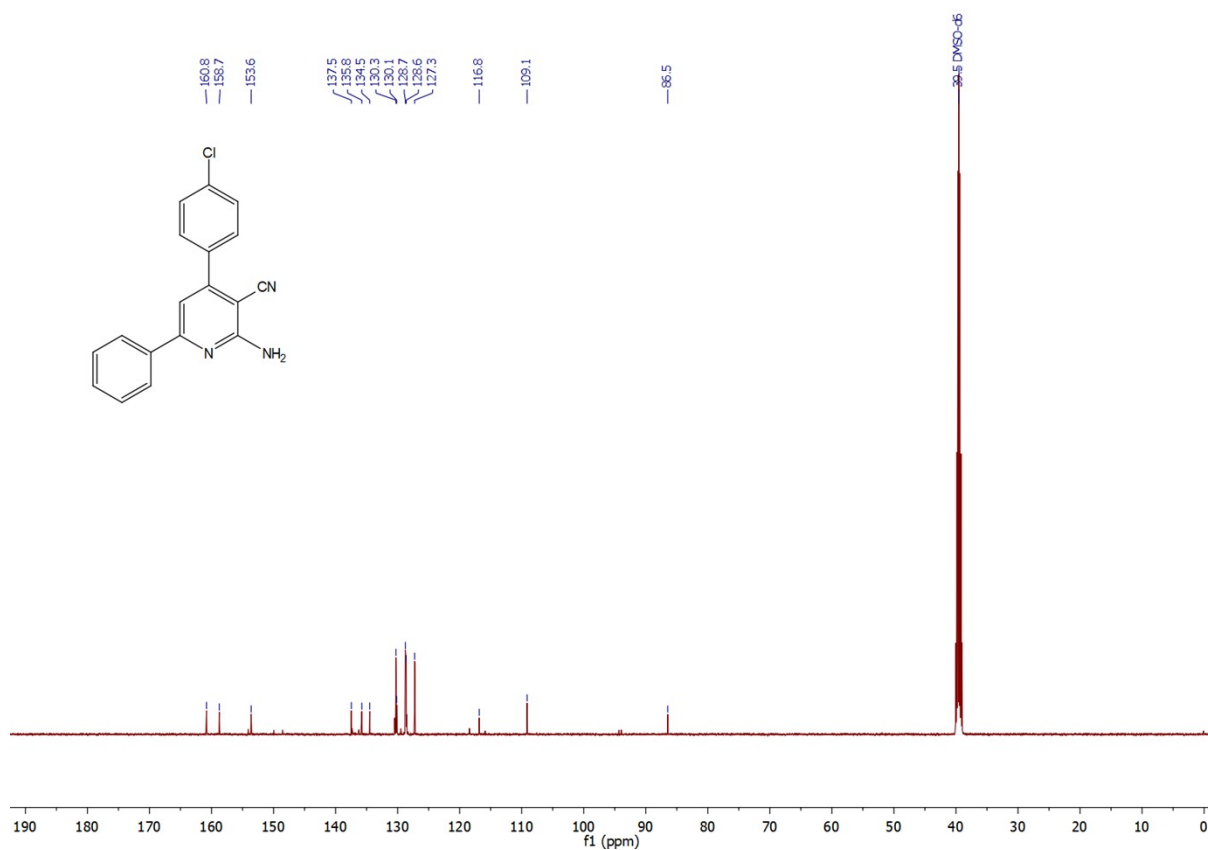

Figure S2-12.2.  $^{13}\text{C}$ -NMR spectrum of 12a

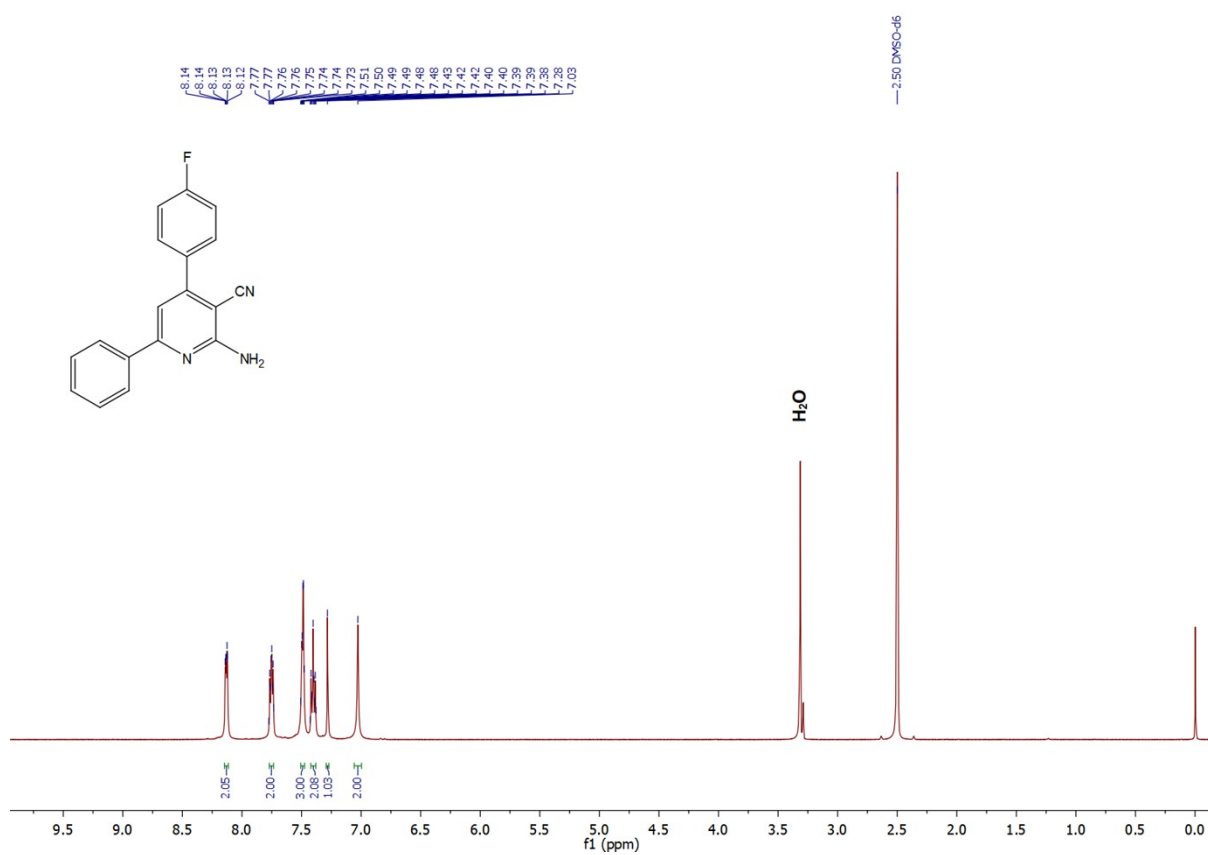

Figure S2-13.1.  $^1\text{H}$ -NMR spectrum of 13a



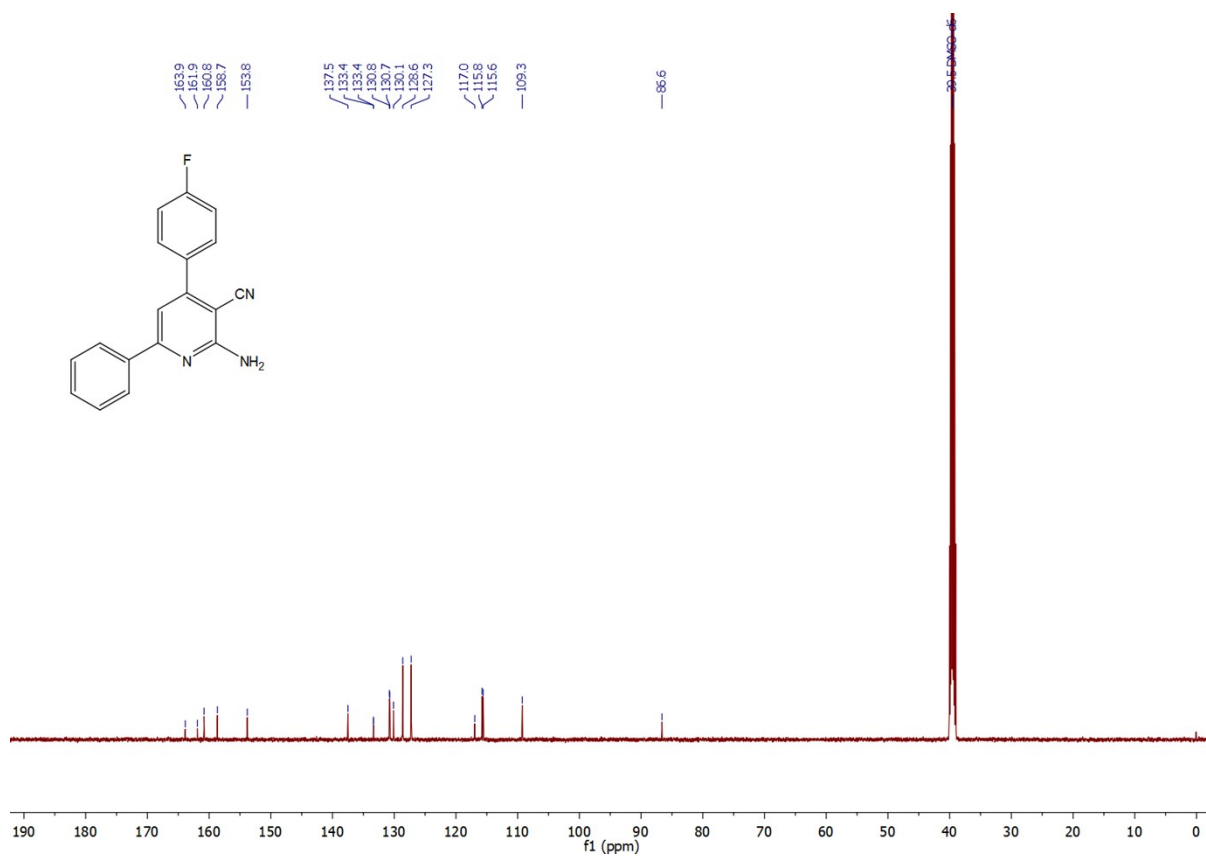

Figure S2-13.2.  $^{13}\text{C}$ -NMR spectrum of 13a

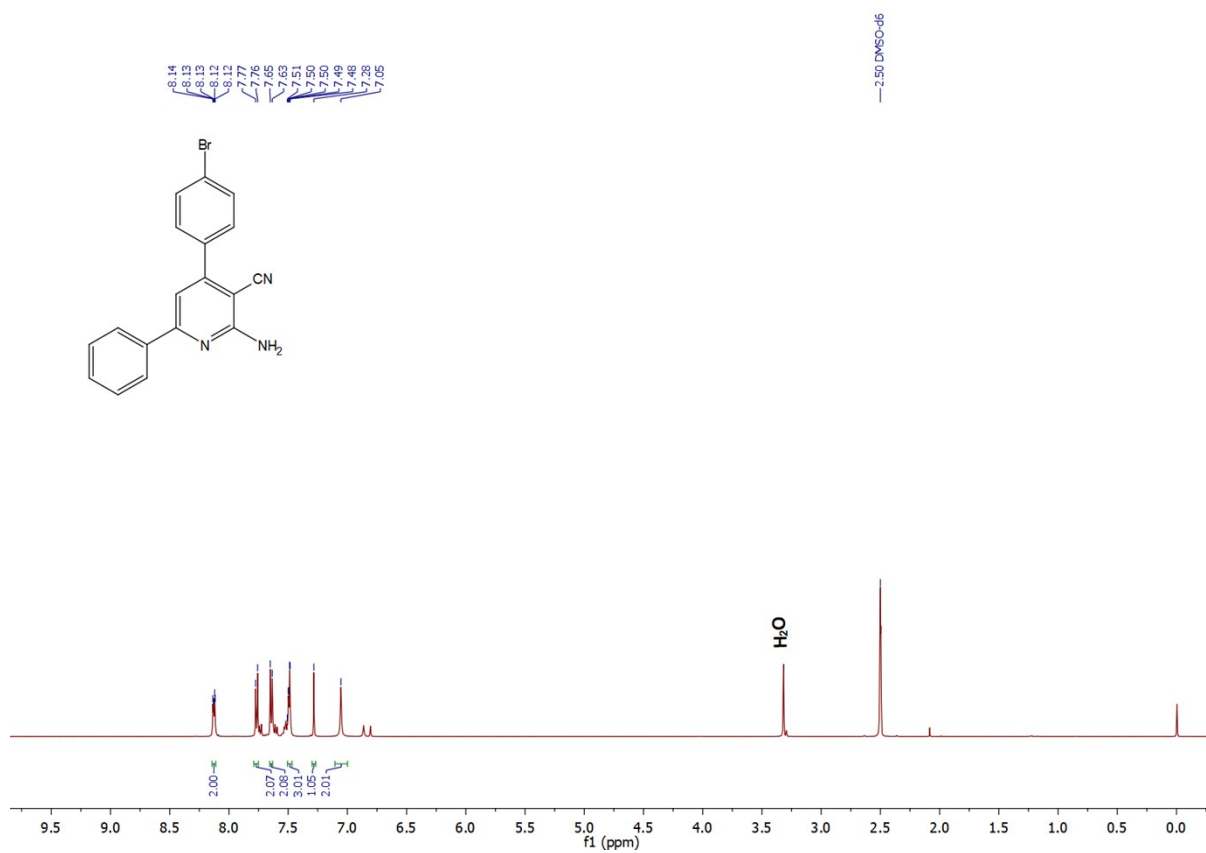

Figure S2-14.1.  $^1\text{H}$ -NMR spectrum of 14a

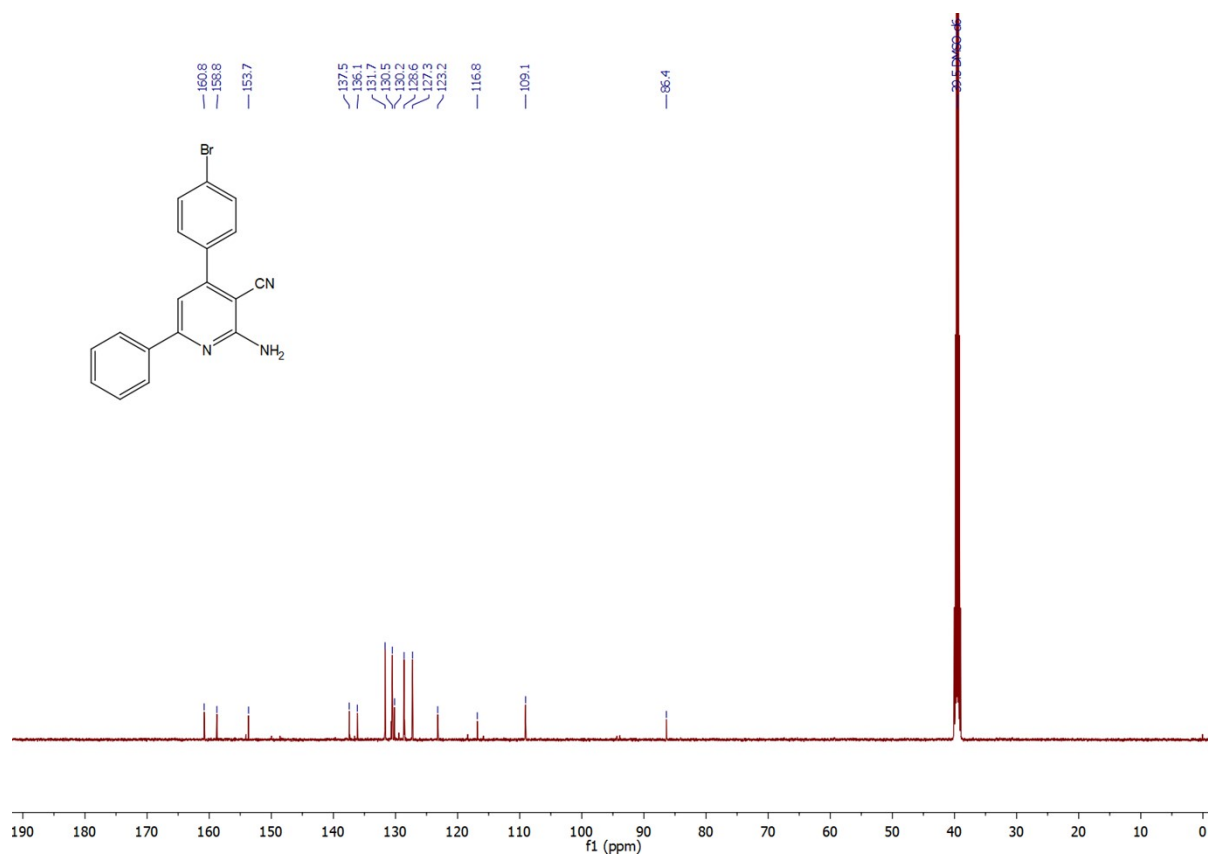

Figure S2-14.2.  $^{13}\text{C}$ -NMR spectrum of 14a

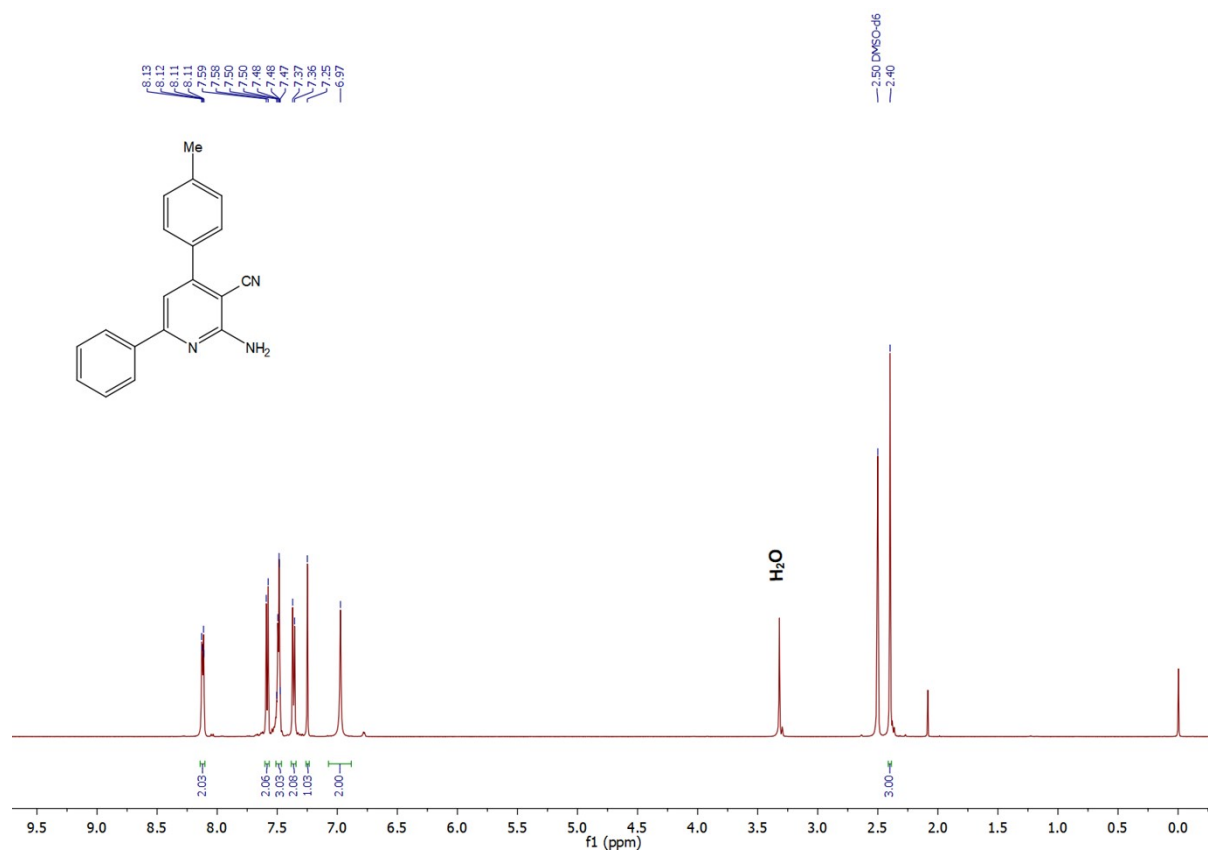

Figure S2-15.1.  $^1\text{H}$ -NMR spectrum of 15a

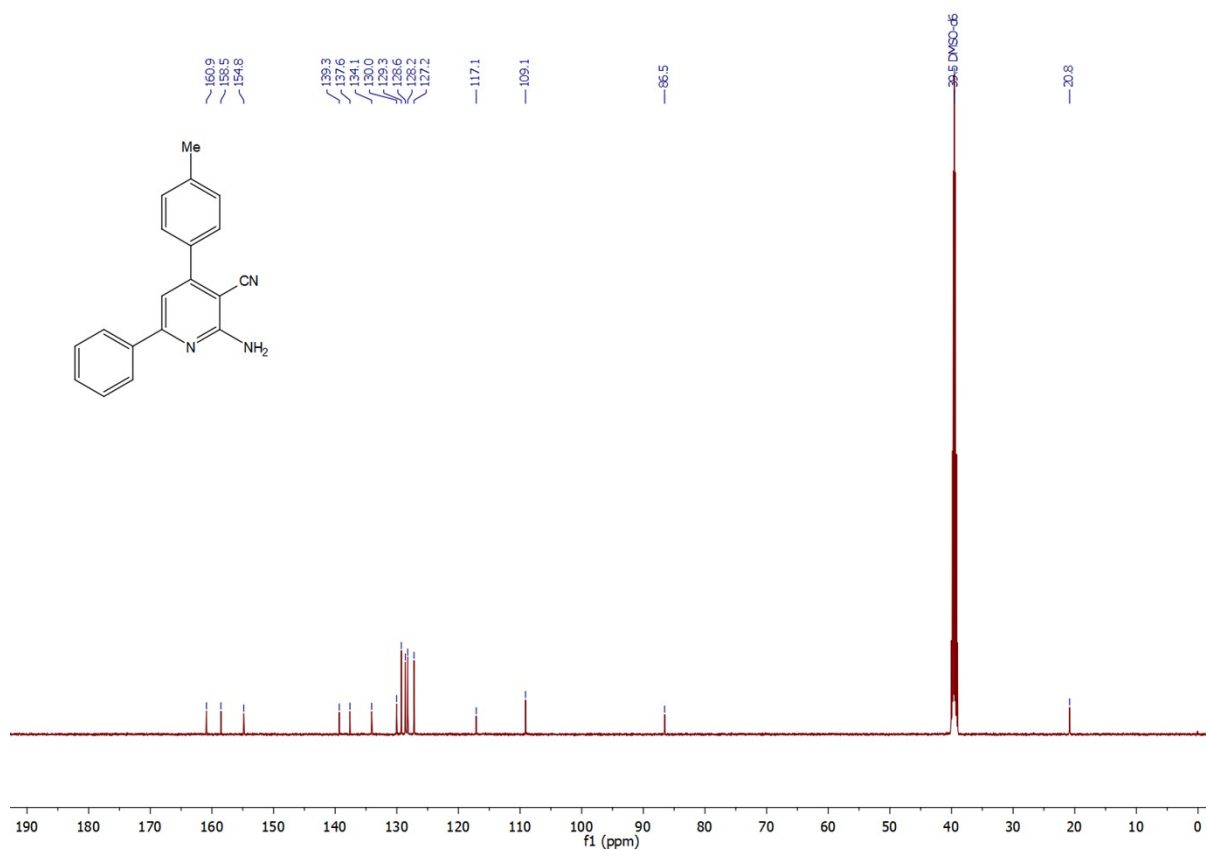

Figure S2-15.2.  $^{13}\text{C}$ -NMR spectrum of 15a

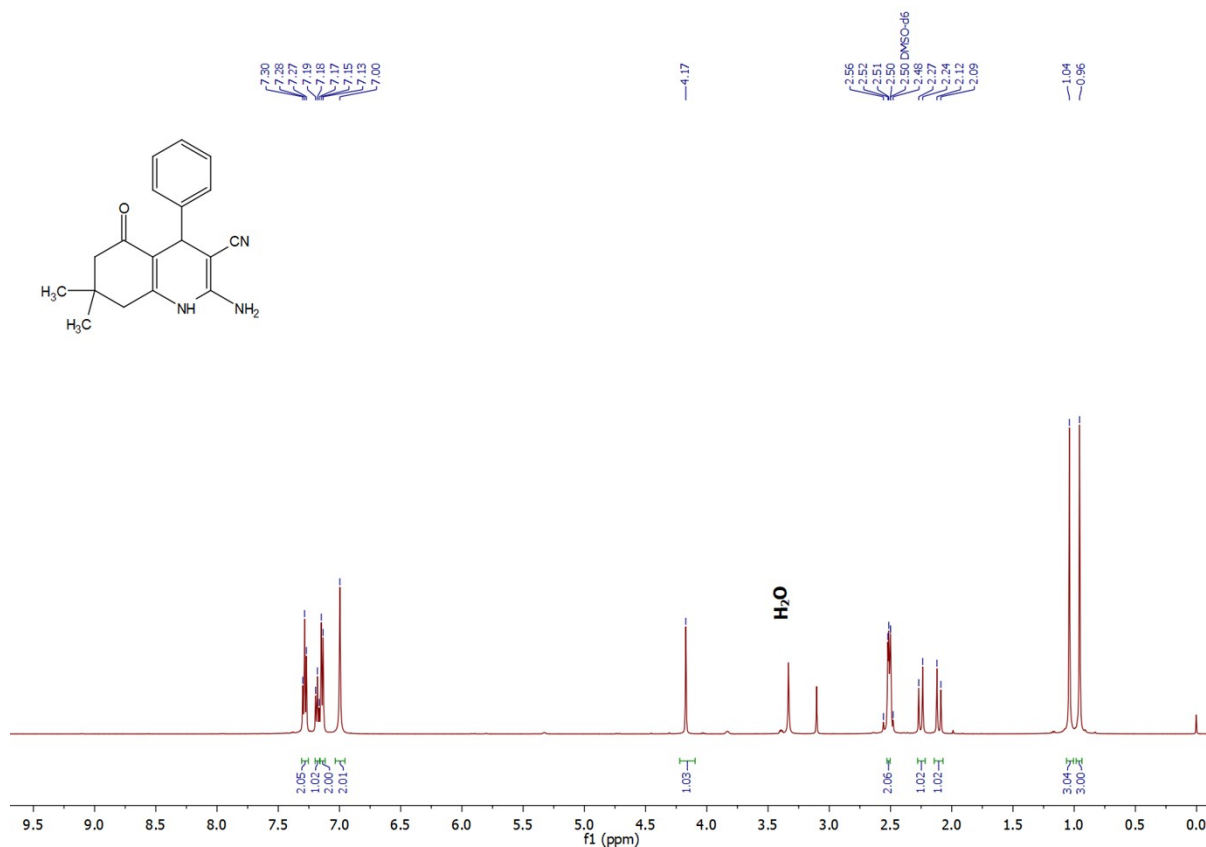

Figure S2-16.1.  $^1\text{H}$ -NMR spectrum of 16b

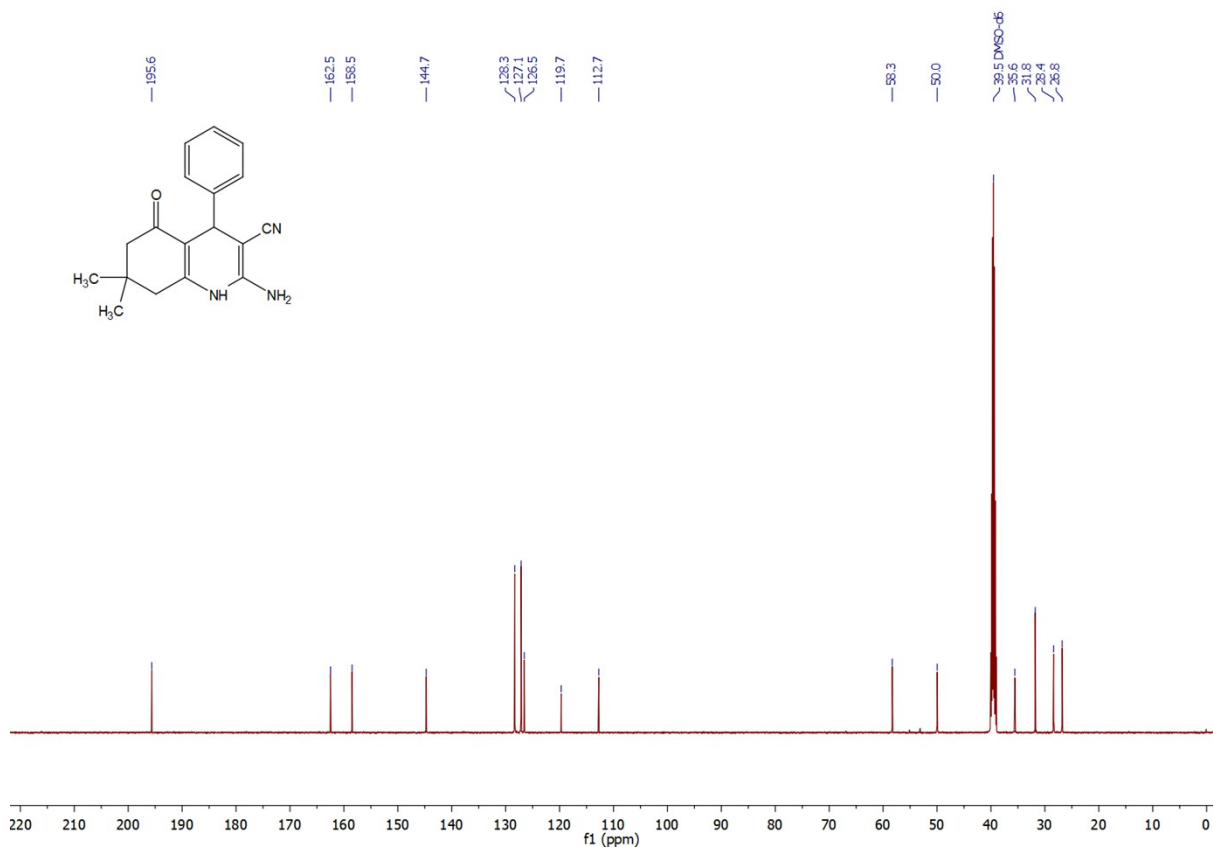

Figure S2-16.2.  $^{13}\text{C}$ -NMR spectrum of 16b

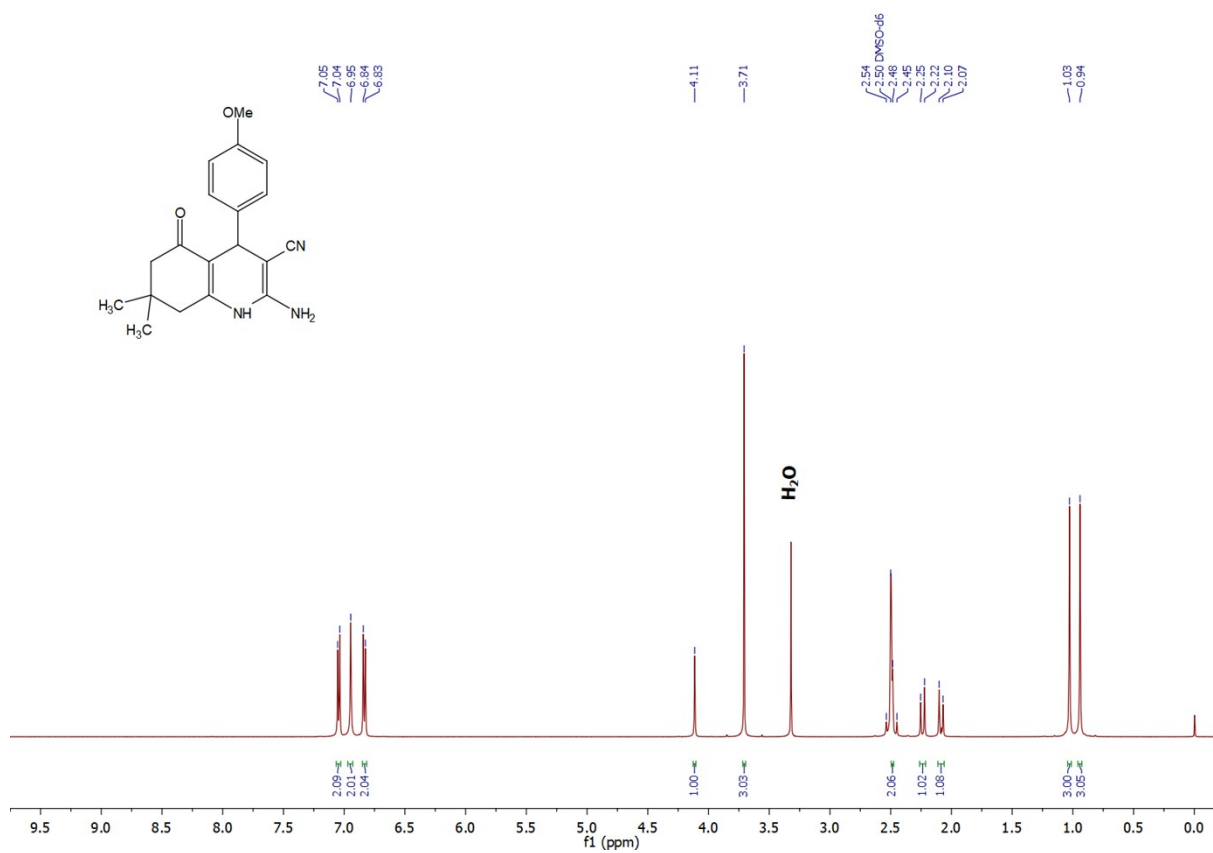

Figure S2-17.1.  $^1\text{H}$ -NMR spectrum of 17b

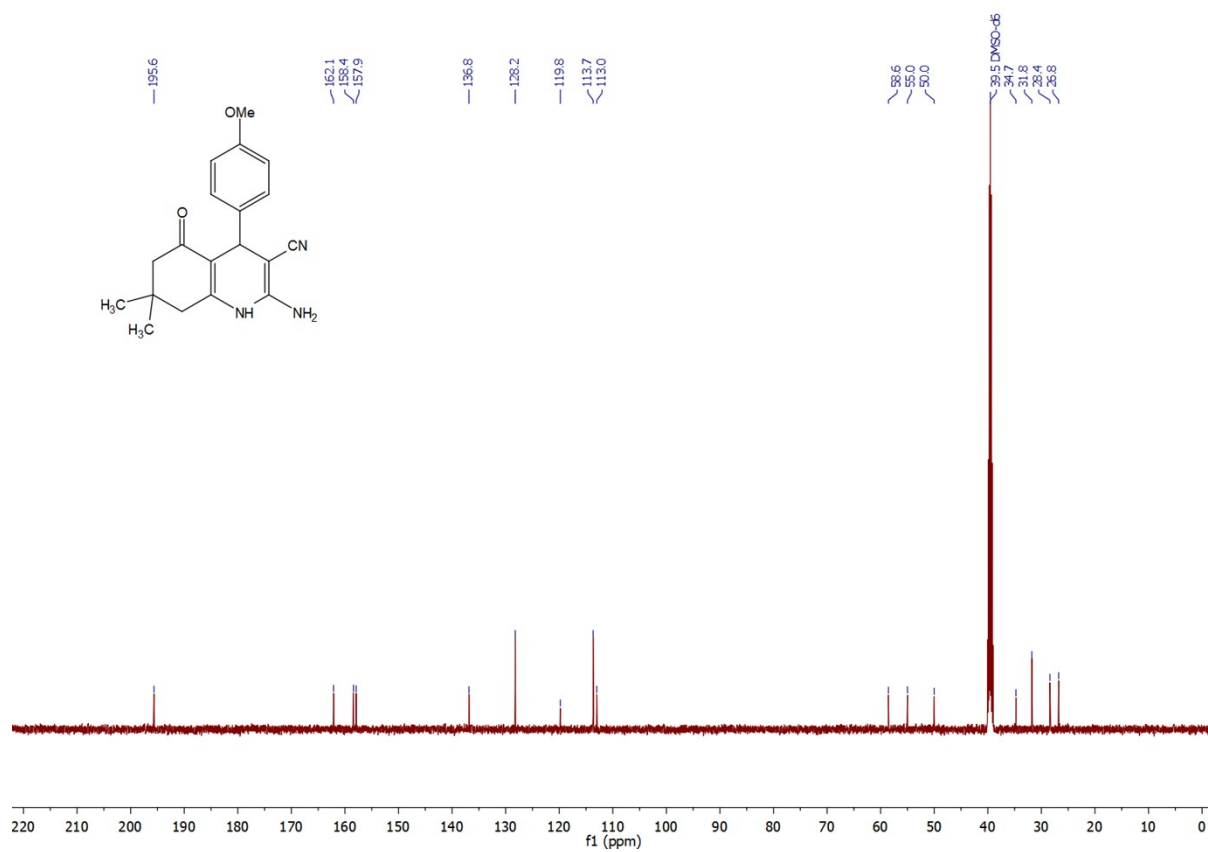

Figure S2-17.2.  $^{13}\text{C}$ -NMR spectrum of 17b

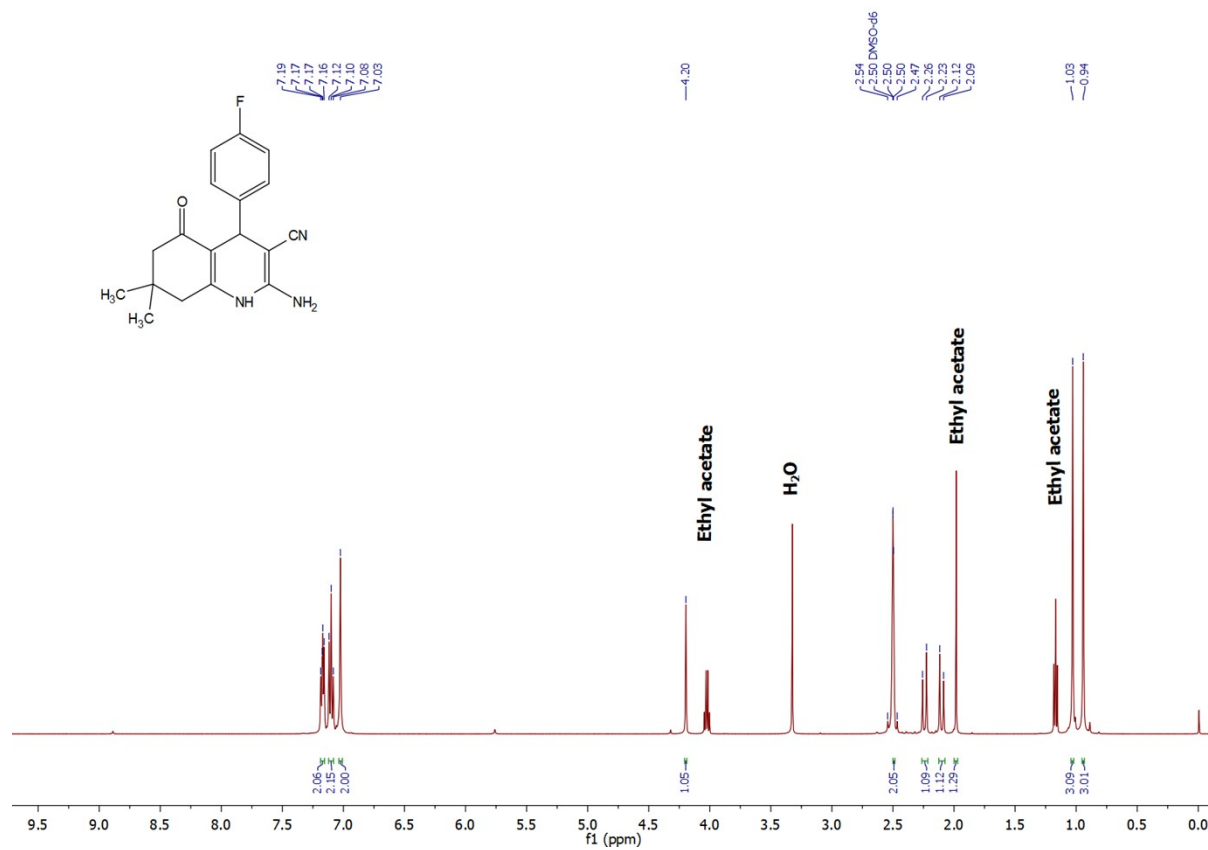

Figure S2-18.1.  $^1\text{H}$ -NMR spectrum of 18b

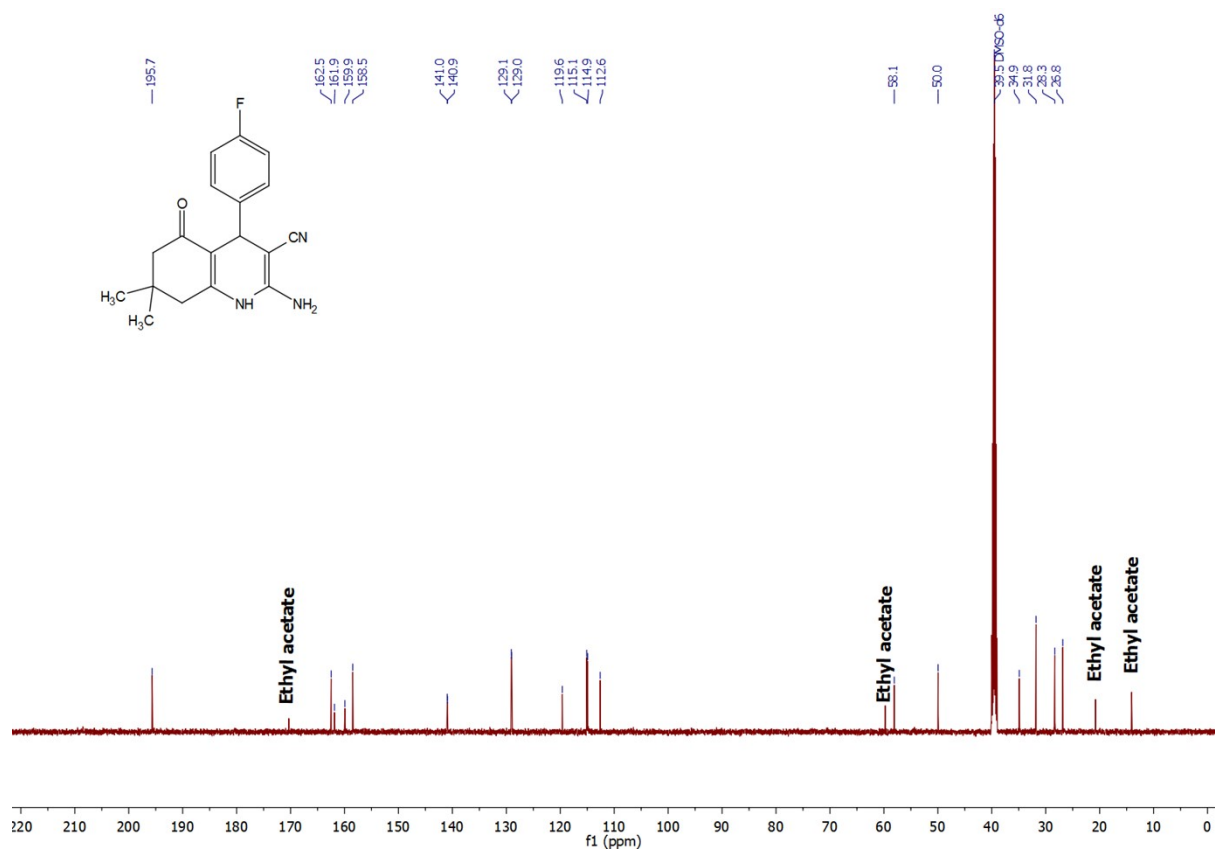

Figure S2-18.2.  $^{13}\text{C-NMR}$  spectrum of 18b

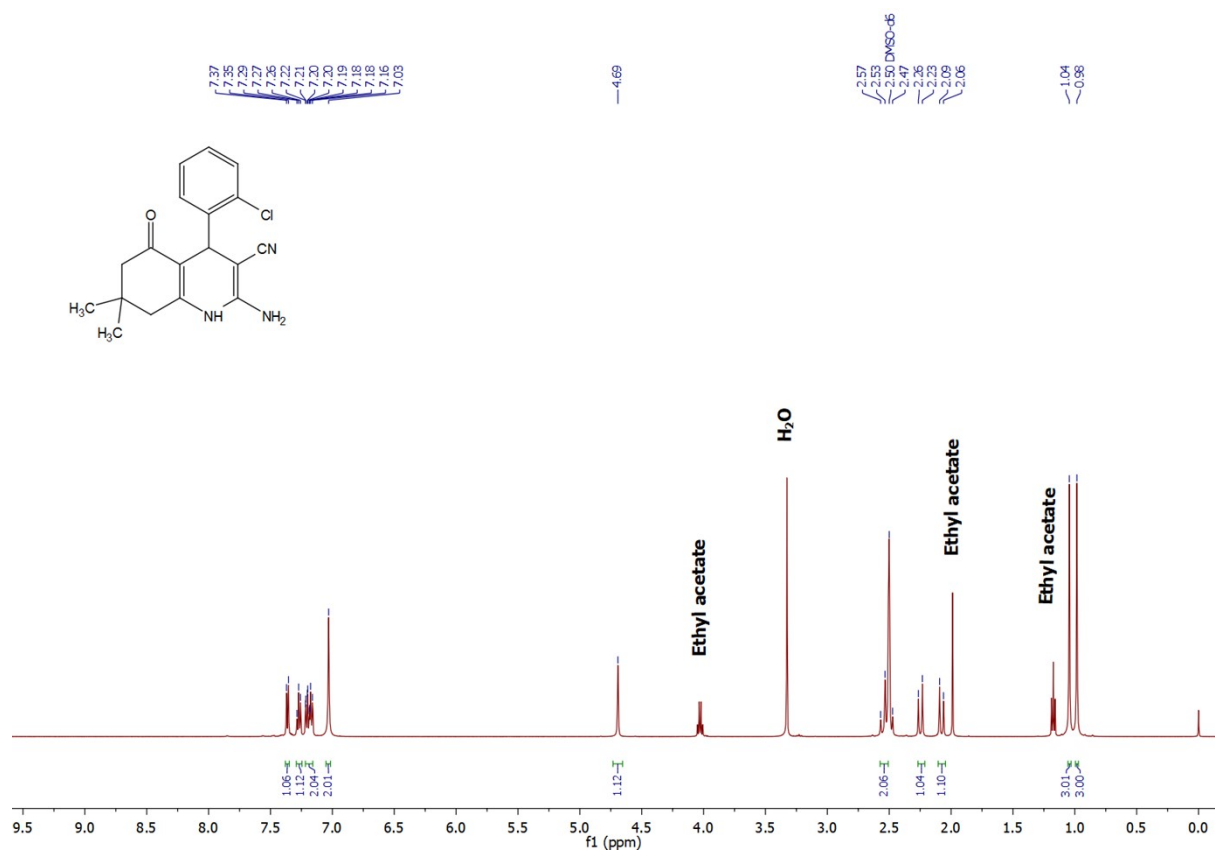

Figure S2-19.1.  $^1\text{H-NMR}$  spectrum of 19b

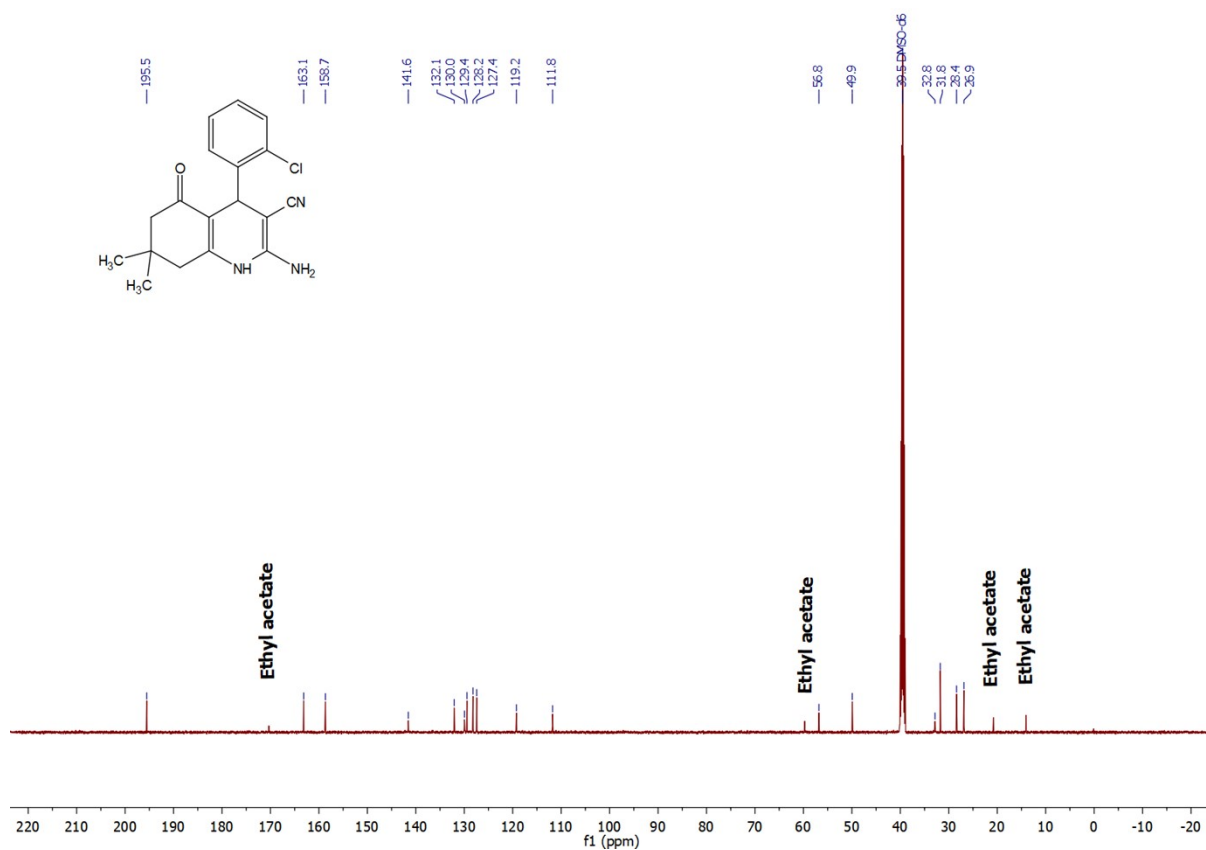

Figure S2-19.2. <sup>13</sup>C-NMR spectrum of 19b

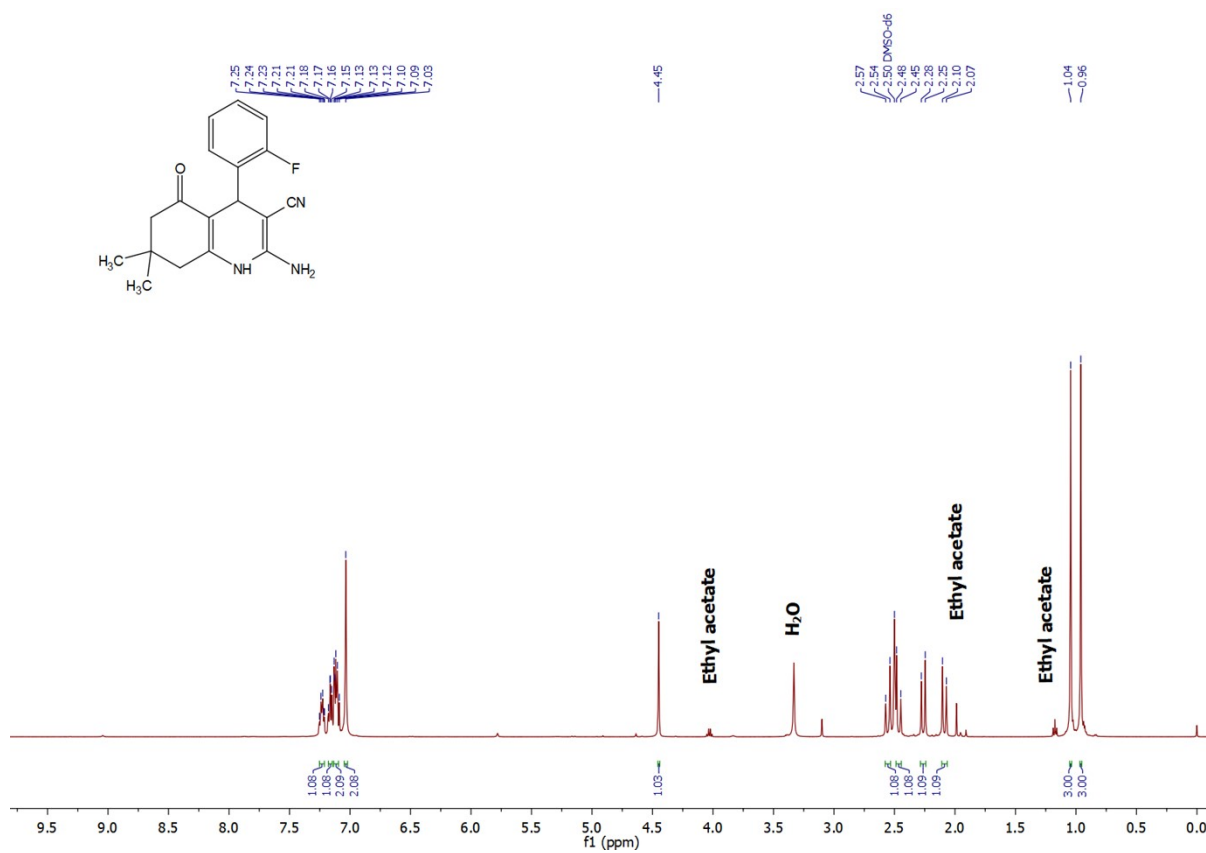

Figure S2-20.1. <sup>1</sup>H-NMR spectrum of 20b

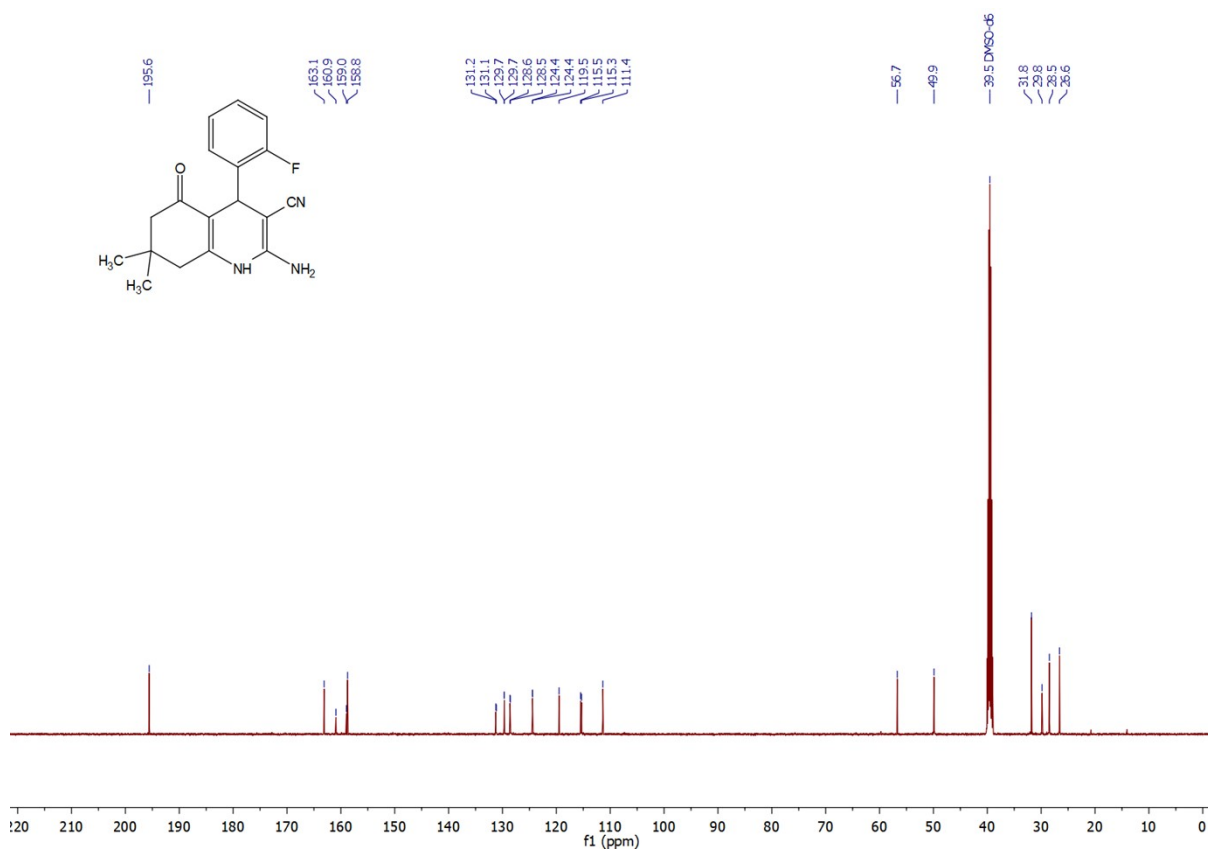

Figure S2-20.2.  $^{13}\text{C}$ -NMR spectrum of 20b

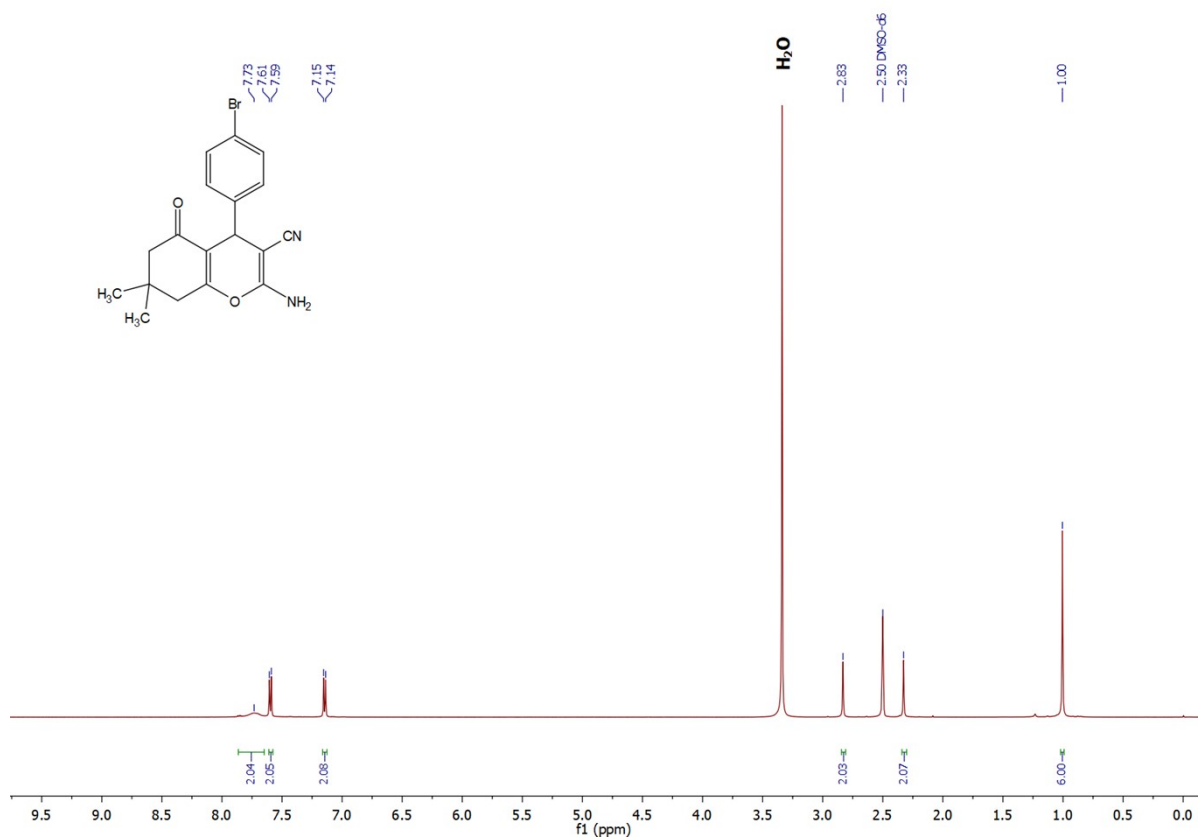

Figure S2-21.1.  $^1\text{H}$ -NMR spectrum of 21b



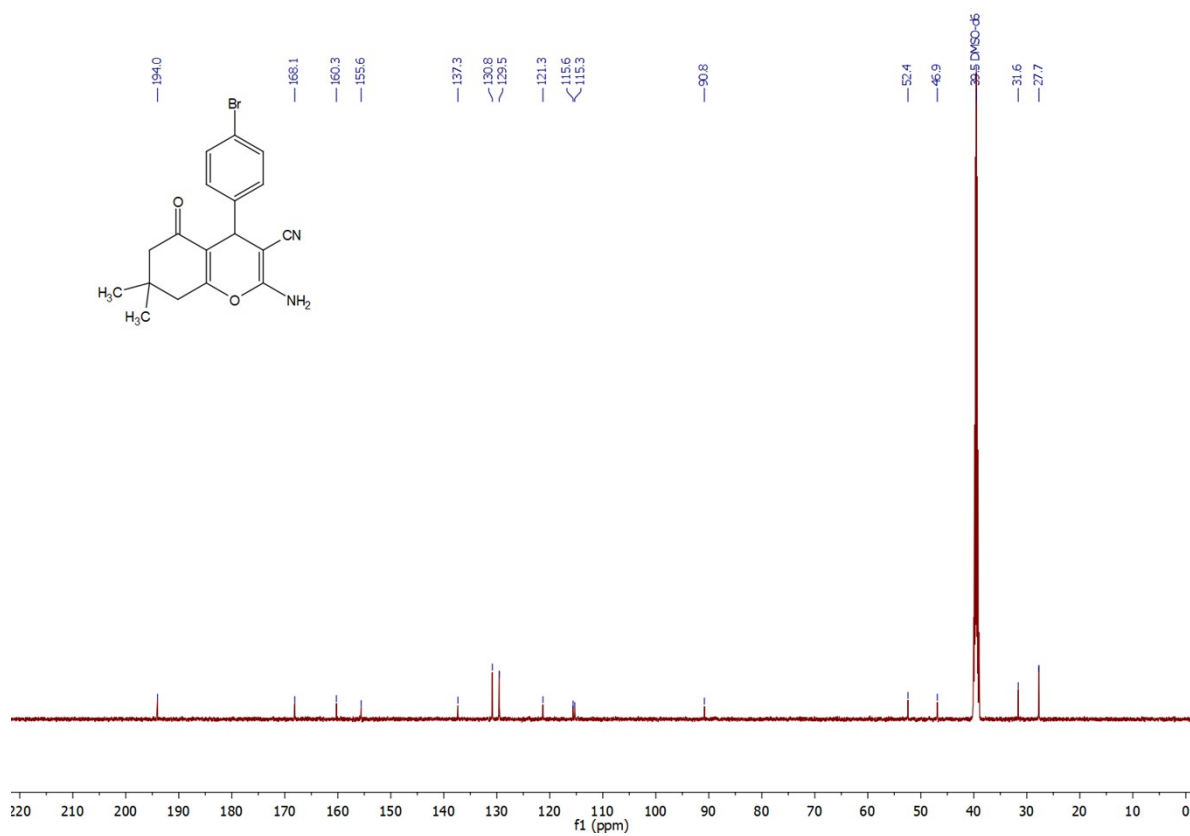

Figure S2-21.2.  $^{13}\text{C}$ -NMR spectrum of 21b

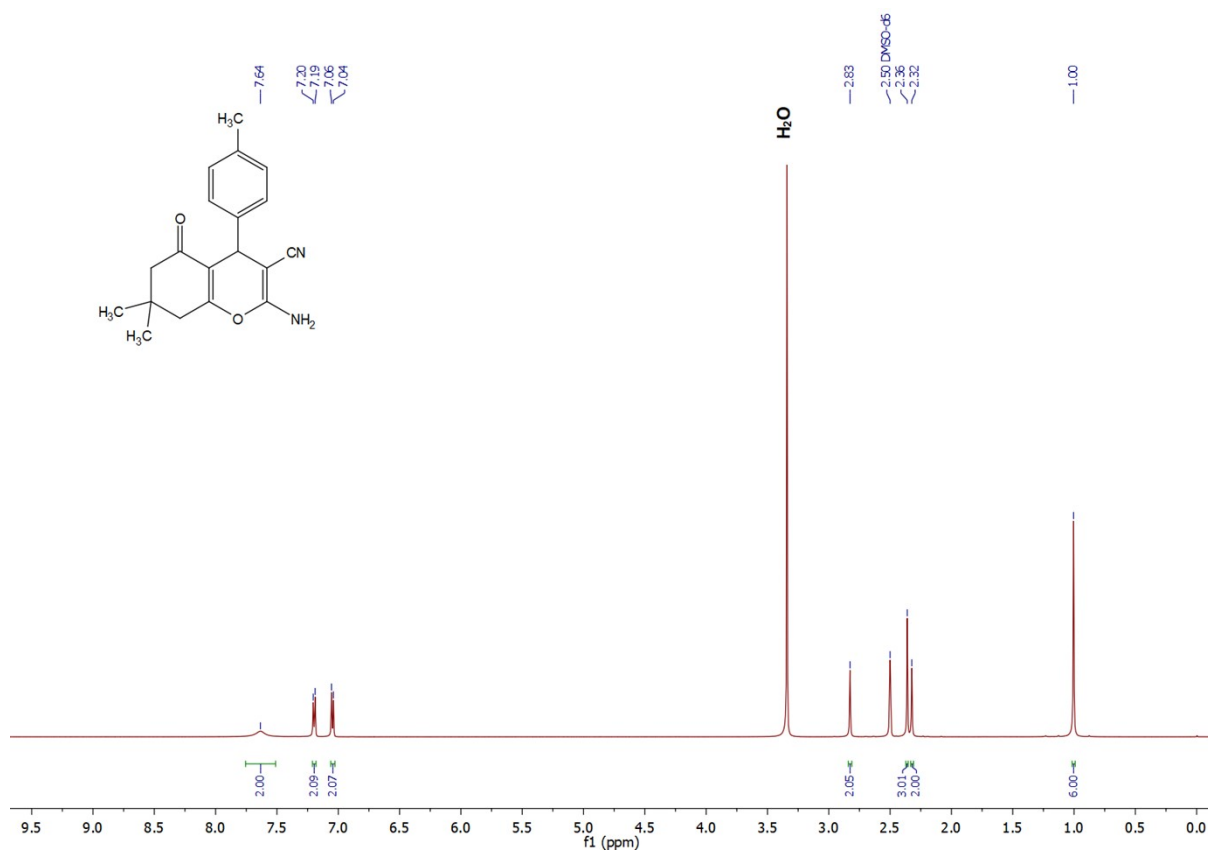

Figure S2-22.1.  $^1\text{H}$ -NMR spectrum of 22b

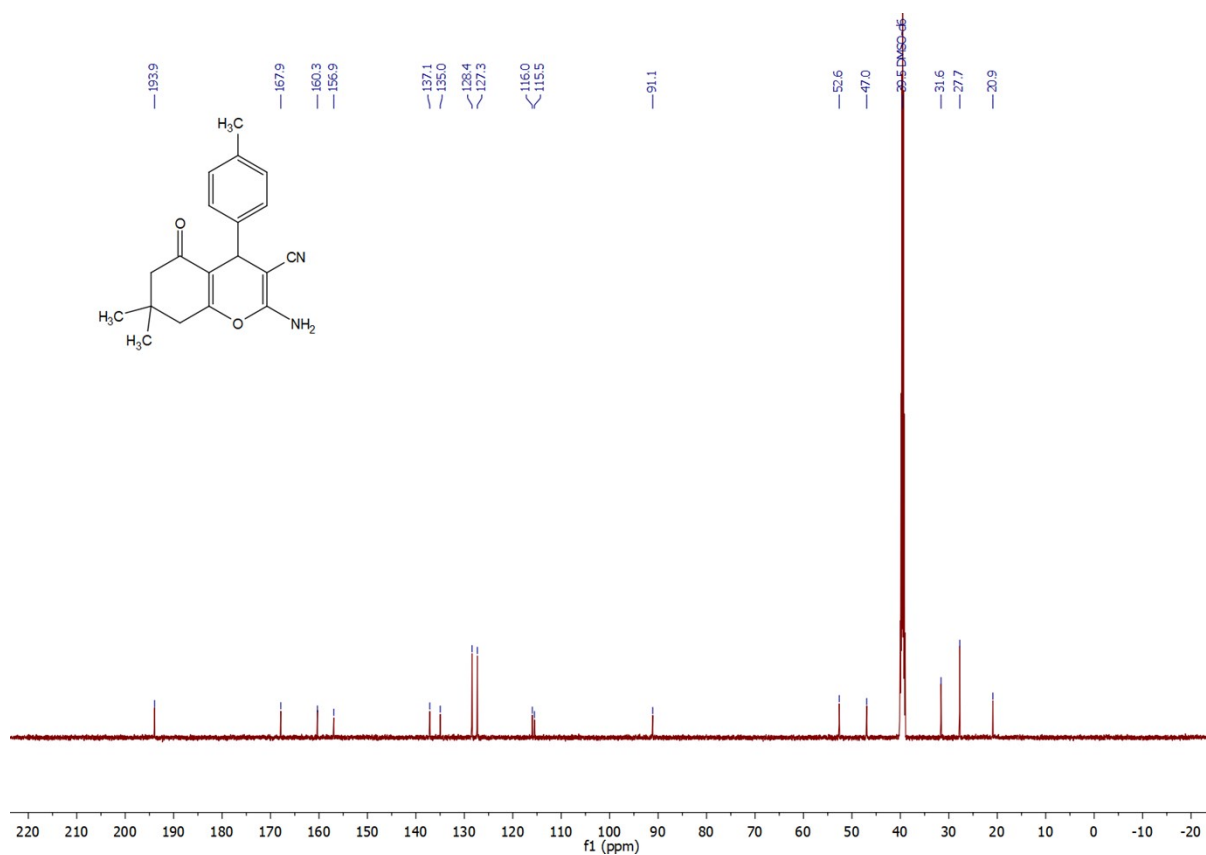

Figure S2-22.2.  $^{13}\text{C-NMR}$  spectrum of 22b

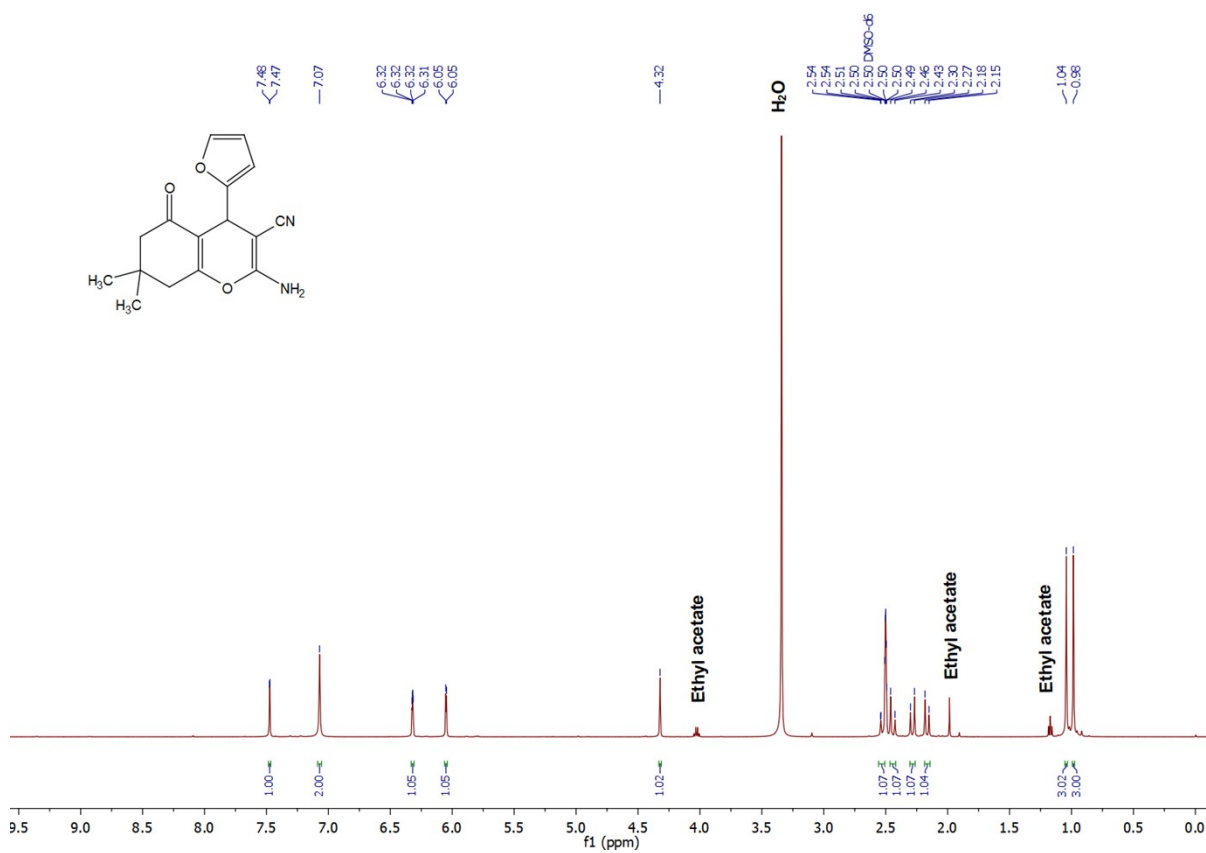

Figure S2-23.1.  $^1\text{H-NMR}$  spectrum of 23b

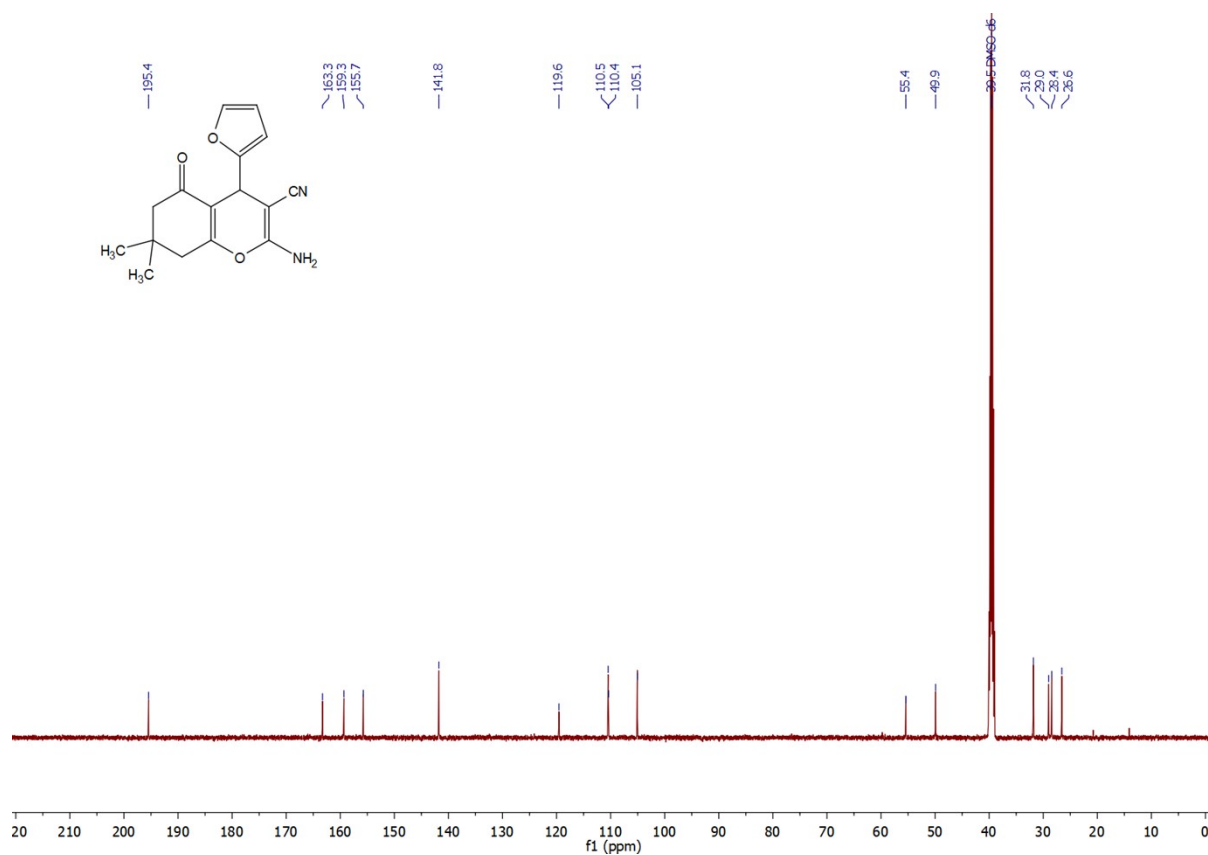

Figure S2-23.2.  $^{13}\text{C-NMR}$  spectrum of 23b

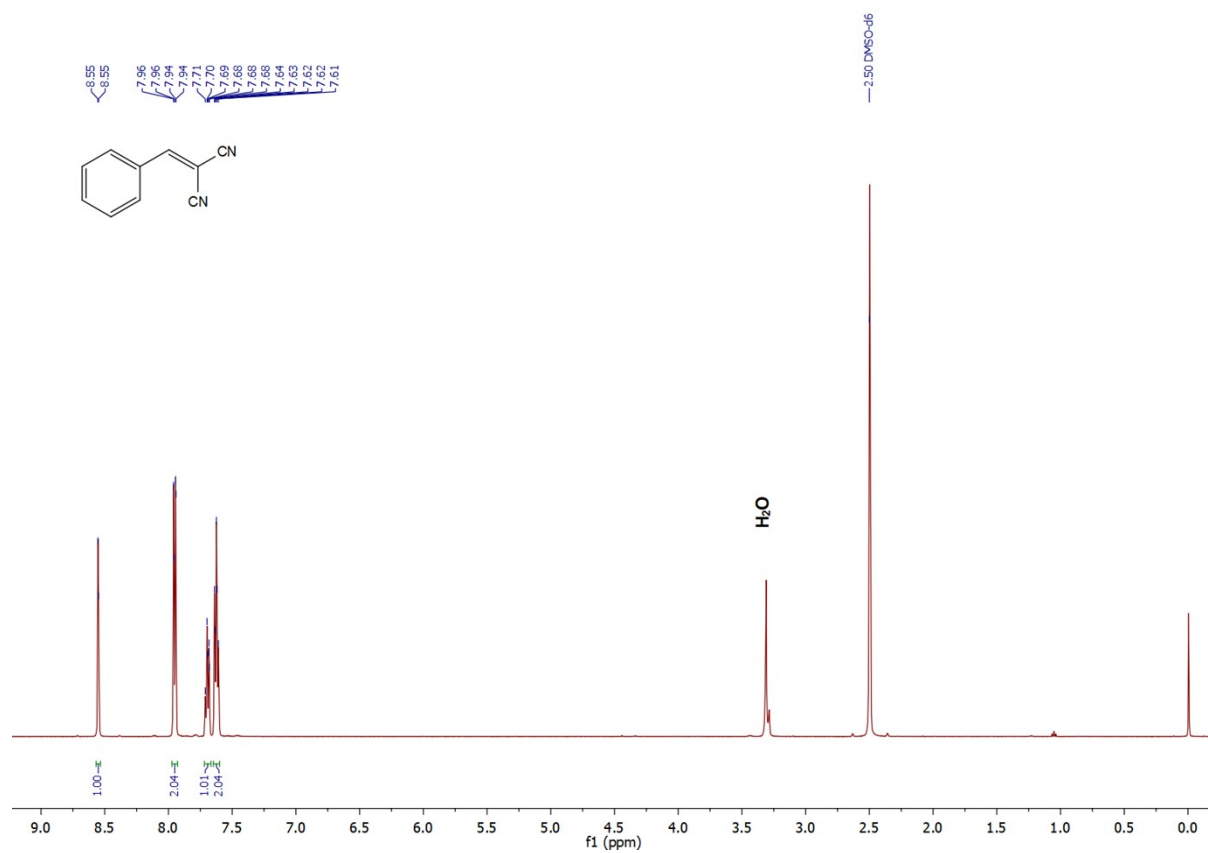

Figure S2-24.1.  $^1\text{H-NMR}$  spectrum of 2-benzylidenemalononitrile

#### Section S4. References

1. Y. M. Elkholy and M. A. Morsy, *Molecules*, 2006, 11, 890-903.
2. S. Asadbegi, M. A. Bodaghifard and A. Mobinikhaledi, *Research on Chemical Intermediates*, 2020, 46, 1629-1643.
3. S. Khaksar and M. Yaghoobi, *Journal of Fluorine Chemistry*, 2012, 142, 41-44.
4. M. Edrisi and N. Azizi, *Journal of the Iranian Chemical Society*, 2020, 17, 901-910.
5. G. Bosica and R. Abdilla, *Tetrahedron Green Chem*, 2023, 100033.
6. N. Mollakarimi Dastjerdi and M. Ghanbari, *Green Chemistry Letters and Reviews*, 2020, 13, 192-205.
7. J. Safaei-Ghomi, R. Aghagoli and H. Shahbazi-Alavi, *Zeitschrift für Naturforschung B*, 2018, 73, 269-274.
8. J. Safari, S. H. Banitaba and S. D. Khalili, *Ultrasonics sonochemistry*, 2012, 19, 1061-1069.
9. M. A. Zolfigol and M. Yarie, *Applied Organometallic Chemistry*, 2017, 31, e3598.
10. S. S. Mansoor, K. Aswin, K. Logaiya and S. Sudhan, *Journal of Saudi Chemical Society*, 2016, 20, 517-522.
11. M. A. Nasser and S. M. Sadeghzadeh, *Journal of the Iranian Chemical Society*, 2013, 10, 1047-1056.
12. L.-Q. Yu, F. Liu and Q.-D. You, *Organic Preparations and Procedures International*, 2009, 41, 77-82.
13. M. A. Zolfigol, A. Khazaei, A. R. Moosavi-Zare, J. Afsar, V. Khakyzadeh and O. Khaledian, *Journal of the Chinese Chemical Society*, 2015, 62, 398-403.
14. A. R. Moosavi-Zare, M. A. Zolfigol, O. Khaledian, V. Khakyzadeh, M. D. Farahani and H. G. Kruger, *New Journal of Chemistry*, 2014, 38, 2342-2347.
15. A. Ghobadpoor, M. M. Eskandari, A. Zare and M. Karami, *Iranian Journal of Catalysis*, 2021, 11, 69-75.
16. L. Chen, Z. Lin, X. Zhang, L. Tan, M. Zhang and Y. Li, *Environmental Chemistry Letters*, 2021, 19, 1831-1837.

17. A. Khazaei, F. Gholami, V. Khakyzadeh, A. R. Moosavi-Zare and J. Afsar, *RSC Advances*, 2015, 5, 14305-14310.
